# Supplementary material for: Integrative Analyses of Transcriptomes and Metabolomes Reveal Associated Genes and Metabolites with Flowering Regulation in Common Vetch (Vicia sativa L.)
Source: Int J Mol Sci. 2022 Jun 19;23(12):6818. doi: 10.3390/ijms23126818 (PMC9224626; doi:10.3390/ijms23126818)
Supplement: Supplementary file 1 [file ijms-23-06818-s001.zip › Table S1.xlsx]

## Sheet: Sheet1
Table S1. Summary of the RNA-Seq data analysis.
No.	Sample ID	Read Sum	Base Sum	GC (%)	Q20 (%)	Q30 (%)	Mapped Reads	Mapped Ratio (%)
1	Lan3-63d1	22788835	6815319040	43.71	98.02	94.43	19879674	0.8723
2	Lan3-63d2	24774517	7402991410	43.64	97.99	94.44	21532048	0.8691
3	Lan3-63d3	23975896	7168372056	43.63	97.98	94.4	20964235	0.8744
4	Lan3-70d1	21718120	6497871382	43.75	98.14	94.68	19008784	0.8752
5	Lan3-70d2	20644333	6165741188	43.62	98.12	94.59	17999617	0.8719
6	Lan3-70d3	24048325	7193372428	43.57	98.07	94.57	21004893	0.8734
7	Lan3-77d1	23480154	7008933036	43.4	98.08	94.55	20399475	0.8688
8	Lan3-77d2	24189848	7243304396	43.29	97.95	94.33	21052348	0.8703
9	Lan3-77d3	22842247	6841825890	43.36	97.73	93.78	19870193	0.8699
10	503-63d1	26884156	8041051670	43.7	97.8	93.9	23517715	0.8748
11	503-63d2	26431815	7894308044	43.81	97.86	94.17	23212988	0.8782
12	503-63d3	22404304	6698231170	43.85	97.87	94.08	19661261	0.8776
13	503-70d1	20117448	6016211558	43.57	98.05	94.52	17549647	0.8724
14	503-70d2	28264050	8458845824	43.75	98.04	94.55	24808732	0.8777
15	503-70d3	23148137	6925636862	43.99	98.15	94.7	20352783	0.8792
16	503-77d1	25146285	7525774104	44.09	97.69	93.9	21944635	0.8727
17	503-77d2	25304762	7565136138	43.59	98.03	94.51	22104898	0.8735
18	503-77d3	25256860	7557093686	43.62	97.74	93.92	21949160	0.869
