# Supplementary material for: Integrative Analyses of Transcriptomes and Metabolomes Reveal Associated Genes and Metabolites with Flowering Regulation in Common Vetch (Vicia sativa L.)
Source: Int J Mol Sci. 2022 Jun 19;23(12):6818. doi: 10.3390/ijms23126818 (PMC9224626; doi:10.3390/ijms23126818)
Supplement: Supplementary file 1 [file ijms-23-06818-s001.zip › Table S2.xlsx]

## Sheet: Sheet1
Table S2. Primers used in the present study.
No.	Gene name	Forward primer (5'-3')	Reverse primer (5'-3')
1	c22740.graph_c0	TGTGAGGTTGGTGAGATTG	CTAGTGTTCCACGATCATTAC
2	c28850.graph_c0	GATGTTGTTGATGAACCTACC	GCATACAAGAAGACCGAGTT
3	c30118.graph_c0	GAATGCTAGAATCAGTGTGA	CAACATACTCCTAGTTACTCTC
4	c39237.graph_c0	TGATCCACAAGTCAATGAGT	GTCAGTATCGTGTCGTATCT
5	c46011.graph_c0	TTCCACATTACTCCAACCTT	GCAATGAATGATGATGGTGA
6	c51399.graph_c1	TTAGCAGTTGAGAGTCATCT	AGAGTTATACCTTCCCATGTG
7	c53609.graph_c0	CGAATATGTTGTGAGTTAGGAG	AAGATCAAACGGTTGGGATT
8	c59074.graph_c0	CTATTGGCTACAAGGAAGATG	TGGTAGACTCAGAGGATACA
9	c59638.graph_c0	AACGCCAGTTGCTTCTAA	GTTCCTAGTCTGATTCATTCG
10	c60306.graph_c1	TTCTAGGTTCAGCAGCAA	CAAATGACATGGCATCATAC
11	c60808.graph_c0	GTTATTCATCACAGCAAGCA	AATTCAGTCTCCACATCAGA
12	c62267.graph_c0	GATGACCGACGAACAACT	ACAGTACAGATTACCGAGTC
13	Unigene68614	GCTAAAGCATTGAACAACAAAAGA	GCAAAGTTTGTCCCTTCACC
