# Supplementary material for: Integrative Analyses of Transcriptomes and Metabolomes Reveal Associated Genes and Metabolites with Flowering Regulation in Common Vetch (Vicia sativa L.)
Source: Int J Mol Sci. 2022 Jun 19;23(12):6818. doi: 10.3390/ijms23126818 (PMC9224626; doi:10.3390/ijms23126818)
Supplement: Supplementary file 1 [file ijms-23-06818-s001.zip › Table S3.xlsx]

## Sheet: Sheet1
Table S3. Details of the 55 DEGs in the grey module.
No.	Gene ID	COG_annotation	GO_annotation	KEGG_annotation	KOG_annotation	NR_annotation
1	c23866.graph_c0	--	Biological Process: lipid transport (GO:0006869);; Molecular Function: lipid binding (GO:0008289);;	--	--	PREDICTED: non-specific lipid-transfer protein 1-like [Cicer arietinum]
2	c51041.graph_c0	Signal transduction mechanisms	Molecular Function: protein kinase activity (GO:0004672);; Molecular Function: ATP binding (GO:0005524);; Biological Process: protein phosphorylation (GO:0006468);;	K14500|0|cam:101507849|K14500 BR-signaling kinase [EC:2.7.11.1] | (RefSeq) probable serine/threonine-protein kinase At5g41260	--	PREDICTED: probable serine/threonine-protein kinase At5g41260 isoform X1 [Cicer arietinum]
3	c54187.graph_c1	--	Cellular Component: integral component of membrane (GO:0016021);;	--	--	sulfite exporter TauE/SafE family protein [Medicago truncatula]
4	c53138.graph_c0	--	--	--	--	F-box plant-like protein [Medicago truncatula]
5	c57636.graph_c0	Carbohydrate transport and metabolism	Biological Process: flavonoid biosynthetic process (GO:0009813);; Cellular Component: intracellular membrane-bounded organelle (GO:0043231);; Biological Process: flavonoid glucuronidation (GO:0052696);; Molecular Function: quercetin 3-O-glucosyltransferase activity (GO:0080043);; Molecular Function: quercetin 7-O-glucosyltransferase activity (GO:0080044);;	--	--	flavonoid glucosyltransferase [Medicago truncatula]
6	c49344.graph_c0	--	Molecular Function: magnesium ion binding (GO:0000287);; Molecular Function: glycerophosphodiester phosphodiesterase activity (GO:0008889);; Cellular Component: plastid (GO:0009536);; Biological Process: cellular phosphate ion homeostasis (GO:0030643);; Biological Process: glycerophospholipid catabolic process (GO:0046475);; Molecular Function: glycerophosphoinositol glycerophosphodiesterase acti…	--	General function prediction only	glycerophosphoryl diester phosphodiesterase family protein [Medicago truncatula]
7	c30473.graph_c0	--	Cellular Component: integral component of membrane (GO:0016021);; Molecular Function: transferase activity, transferring glycosyl groups (GO:0016757);;	--	--	GDP-fucose protein O-fucosyltransferase [Medicago truncatula]
8	c49472.graph_c1	--	Cellular Component: intracellular (GO:0005622);; Molecular Function: zinc ion binding (GO:0008270);;	--	--	salt tolerance-like protein [Medicago truncatula]
9	c52230.graph_c1	Defense mechanisms	Molecular Function: ATP binding (GO:0005524);; Cellular Component: plasma membrane (GO:0005886);; Cellular Component: integral component of membrane (GO:0016021);; Molecular Function: ATPase activity, coupled to transmembrane movement of substances (GO:0042626);; Biological Process: transmembrane transport (GO:0055085);;	--	Secondary metabolites biosynthesis, transport and catabolism	ABC transporter G family member 22-like protein, partial [Trifolium pratense]
10	c61769.graph_c0	--	Molecular Function: endopeptidase inhibitor activity (GO:0004866);; Molecular Function: peptidase activity (GO:0008233);; Biological Process: negative regulation of endopeptidase activity (GO:0010951);;	--	--	Kunitz type trypsin inhibitor [Medicago truncatula]
11	c43687.graph_c0	--	Cellular Component: integral component of membrane (GO:0016021);;	--	--	late embryogenesis abundant protein [Medicago truncatula]
12	c55009.graph_c0	--	--	--	General function prediction only	Ty3/gypsy retrotransposon protein [Trifolium pratense]
13	c53306.graph_c0	--	--	--	--	B-box zinc finger protein, putative [Medicago truncatula]
14	c38093.graph_c0	Lipid transport and metabolism ;; Secondary metabolites biosynthesis, transport and catabolism ;; General function prediction only	Molecular Function: carbonyl reductase (NADPH) activity (GO:0004090);; Cellular Component: integral component of membrane (GO:0016021);; Biological Process: oxidation-reduction process (GO:0055114);;	K15095|2.49786e-116|mtr:MTR_8g031900|K15095 (+)-neomenthol dehydrogenase [EC:1.1.1.208] | (RefSeq) short chain dehydrogenase/reductase	Secondary metabolites biosynthesis, transport and catabolism	short chain dehydrogenase/reductase [Medicago truncatula]
15	c22909.graph_c0	--	--	--	--	PREDICTED: late embryogenesis abundant protein D-34 isoform X1 [Cicer arietinum]
16	c45890.graph_c1	--	Biological Process: polysaccharide catabolic process (GO:0000272);; Molecular Function: beta-amylase activity (GO:0016161);;	K01177|1.87922e-77|mtr:MTR_4g099110|K01177 beta-amylase [EC:3.2.1.2] | (RefSeq) beta-amylase	--	beta-amylase chloroplastic-like [Trifolium pratense]
17	c42192.graph_c0	--	--	--	Energy production and conversion	PREDICTED: LOW QUALITY PROTEIN: ATP synthase subunit a [Gossypium hirsutum]
18	c50856.graph_c0	Energy production and conversion	Cellular Component: mitochondrion (GO:0005739);; Biological Process: generation of precursor metabolites and energy (GO:0006091);; Biological Process: nucleobase-containing compound metabolic process (GO:0006139);; Biological Process: transport (GO:0006810);; Molecular Function: electron carrier activity (GO:0009055);; Molecular Function: oxidoreductase activity (GO:0016491);; Cellular Component:…	K02256|2.67918e-139|csl:CospCoM_p26|K02256 cytochrome c oxidase subunit 1 [EC:1.9.3.1] | (RefSeq) cox1; cytochrome c oxidase subunit 1	Energy production and conversion	cytochrome c oxidase subunit I, partial (mitochondrion) [Lingulodinium polyedrum]
19	c22018.graph_c0	--	Cellular Component: integral component of membrane (GO:0016021);;	--	--	hypothetical protein L195_g015047 [Trifolium pratense]
20	c48531.graph_c0	--	--	--	--	PREDICTED: uncharacterized protein LOC101498170 [Cicer arietinum]
21	c56899.graph_c0	Carbohydrate transport and metabolism	Molecular Function: pectate lyase activity (GO:0030570);; Biological Process: pectin catabolic process (GO:0045490);; Molecular Function: metal ion binding (GO:0046872);;	K01728|2.67474e-150|mtr:MTR_1g047370|K01728 pectate lyase [EC:4.2.2.2] | (RefSeq) pectate lyase family protein	--	probable pectate lyase 8 [Cajanus cajan]
22	c62325.graph_c0	--	--	--	--	hypothetical protein L195_g012926, partial [Trifolium pratense]
23	c27930.graph_c0	--	--	--	--	Lipid transfer protein [Medicago truncatula]
24	c27727.graph_c0	--	Molecular Function: endopeptidase inhibitor activity (GO:0004866);; Biological Process: negative regulation of endopeptidase activity (GO:0010951);;	--	--	hypothetical protein TSUD_295210 [Trifolium subterraneum]
25	c45806.graph_c0	--	Molecular Function: SNARE binding (GO:0000149);; Molecular Function: SNAP receptor activity (GO:0005484);; Biological Process: exocytosis (GO:0006887);; Biological Process: vesicle fusion (GO:0006906);; Cellular Component: integral component of membrane (GO:0016021);; Cellular Component: SNARE complex (GO:0031201);;	K08515|1.04779e-154|cam:101496256|K08515 vesicle-associated membrane protein 7 | (RefSeq) vesicle-associated membrane protein 711-like	Intracellular trafficking, secretion, and vesicular transport	PREDICTED: vesicle-associated membrane protein 711-like [Cicer arietinum]
26	c46332.graph_c0	--	--	--	--	PREDICTED: translationally-controlled tumor protein homolog [Vitis vinifera]
27	c46046.graph_c0	--	Cellular Component: integral component of membrane (GO:0016021);;	--	--	uncharacterized protein LOC107496846 [Arachis duranensis]
28	c56639.graph_c0	Posttranslational modification, protein turnover, chaperones	Biological Process: cellular process (GO:0009987);;	K09580|7.5468e-91|ppp:PHYPADRAFT_207467|K09580 protein disulfide-isomerase A1 [EC:5.3.4.1] | (RefSeq) hypothetical protein	Posttranslational modification, protein turnover, chaperones	hypothetical protein GUITHDRAFT_85427 [Guillardia theta CCMP2712]
29	c59629.graph_c0	Posttranslational modification, protein turnover, chaperones	Biological Process: proteolysis (GO:0006508);; Molecular Function: cysteine-type peptidase activity (GO:0008234);;	--	Posttranslational modification, protein turnover, chaperones	predicted protein [Hordeum vulgare subsp. vulgare]
30	c23119.graph_c0	Cell wall/membrane/envelope biogenesis	--	--	--	polyvinylalcohol dehydrogenase-like protein [Medicago truncatula]
31	c61041.graph_c0	--	--	--	General function prediction only	Retrovirus-related Pol polyprotein from transposon TNT 1-94, partial [Glycine soja]
32	c51600.graph_c0	Secondary metabolites biosynthesis, transport and catabolism ;; Defense mechanisms	Molecular Function: monooxygenase activity (GO:0004497);; Molecular Function: iron ion binding (GO:0005506);; Cellular Component: integral component of membrane (GO:0016021);; Molecular Function: oxidoreductase activity, acting on paired donors, with incorporation or reduction of molecular oxygen (GO:0016705);; Molecular Function: heme binding (GO:0020037);; Biological Process: oxidation-reductio…	K07428|0|mtr:MTR_4g031820|K07428 cytochrome P450 family 4 subfamily X [EC:1.14.14.1] | (RefSeq) cytochrome P450 family monooxygenase	--	cytochrome P450 monooxygenase [Medicago truncatula]
33	c22707.graph_c0	--	--	--	--	putative ABA-induced guard cell protein [Vicia faba]
34	c22469.graph_c0	Energy production and conversion ;; Lipid transport and metabolism	Cellular Component: chloroplast outer membrane (GO:0009707);; Cellular Component: stromule (GO:0010319);; Cellular Component: integral component of membrane (GO:0016021);; Molecular Function: heme binding (GO:0020037);; Molecular Function: metal ion binding (GO:0046872);;	--	Energy production and conversion	cytochrome b5-like heme/steroid-binding domain protein [Medicago truncatula]
35	c37820.graph_c0	Posttranslational modification, protein turnover, chaperones	Biological Process: proteolysis (GO:0006508);; Molecular Function: cysteine-type peptidase activity (GO:0008234);;	K16290|1.67956e-82|mtr:MTR_2g015920|K16290 xylem cysteine proteinase [EC:3.4.22.-] | (RefSeq) papain family cysteine protease	Posttranslational modification, protein turnover, chaperones	papain family cysteine protease [Medicago truncatula]
36	c38657.graph_c0	--	Molecular Function: peroxidase activity (GO:0004601);; Molecular Function: GTP binding (GO:0005525);; Cellular Component: extracellular region (GO:0005576);; Biological Process: response to oxidative stress (GO:0006979);; Molecular Function: heme binding (GO:0020037);; Biological Process: hydrogen peroxide catabolic process (GO:0042744);; Molecular Function: metal ion binding (GO:0046872);; Biolo…	K00430|0|cam:101499171|K00430 peroxidase [EC:1.11.1.7] | (RefSeq) peroxidase 9	--	peroxidase 9-like protein [Trifolium pratense]
37	c45938.graph_c0	--	--	--	--	unknown [Medicago truncatula]
38	c61257.graph_c0	--	--	--	--	hypothetical protein BVRB_037930, partial [Beta vulgaris subsp. vulgaris]
39	c49908.graph_c0	--	--	--	--	PREDICTED: protein LOL1 isoform X2 [Lupinus angustifolius]
40	c54870.graph_c0	Lipid transport and metabolism ;; General function prediction only	Cellular Component: membrane (GO:0016020);; Molecular Function: hydrolase activity, acting on ester bonds (GO:0016788);; Molecular Function: 9,9'-dicis-carotene:quinone oxidoreductase activity (GO:0052886);; Molecular Function: 7,9,9'-tricis-neurosporene:quinone oxidoreductase activity (GO:0052887);; Biological Process: 9,9'-di-cis-zeta-carotene desaturation to 7,9,7',9'-tetra-cis-lycopene (GO:00…	--	--	GDSL-like lipase/acylhydrolase [Medicago truncatula]
41	c38221.graph_c0	Posttranslational modification, protein turnover, chaperones	Molecular Function: metalloendopeptidase activity (GO:0004222);; Biological Process: proteolysis (GO:0006508);; Molecular Function: zinc ion binding (GO:0008270);; Cellular Component: extracellular matrix (GO:0031012);;	--	--	matrix metalloproteinase [Medicago truncatula]
42	c50510.graph_c0	Secondary metabolites biosynthesis, transport and catabolism	Molecular Function: iron ion binding (GO:0005506);; Biological Process: response to light stimulus (GO:0009416);; Biological Process: gibberellin biosynthetic process (GO:0009686);; Biological Process: gibberellic acid mediated signaling pathway (GO:0009740);; Biological Process: unidimensional cell growth (GO:0009826);; Biological Process: flower development (GO:0009908);; Molecular Function: gi…	K05282|0|mtr:MTR_6g464620|K05282 gibberellin 20-oxidase [EC:1.14.11.12] | (RefSeq) gibberellin 20-oxidase	--	GA 20-oxidase [Pisum sativum]
43	c60854.graph_c0	--	--	--	--	hexamerine [Trichophyton violaceum]
44	c53331.graph_c0	General function prediction only	Molecular Function: protein kinase activity (GO:0004672);; Molecular Function: ATP binding (GO:0005524);; Biological Process: protein phosphorylation (GO:0006468);; Cellular Component: integral component of membrane (GO:0016021);;	--	--	PREDICTED: protein STRUBBELIG-RECEPTOR FAMILY 5-like isoform X1 [Cicer arietinum]
45	c22483.graph_c0	Signal transduction mechanisms ;; Transcription	Biological Process: phosphorelay signal transduction system (GO:0000160);; Cellular Component: intracellular (GO:0005622);;	K14492|1.08977e-86|cam:101506648|K14492 two-component response regulator ARR-A family | (RefSeq) two-component response regulator ARR17	Transcription	two-component response regulator ARR17-like protein [Trifolium pratense]
46	c53814.graph_c0	Lipid transport and metabolism ;; General function prediction only	Molecular Function: oxidoreductase activity, acting on the CH-CH group of donors, quinone or related compound as acceptor (GO:0016635);; Molecular Function: hydrolase activity (GO:0016787);; Biological Process: single-organism metabolic process (GO:0044710);;	--	--	PREDICTED: GDSL esterase/lipase At1g29670-like [Cicer arietinum]
47	c58280.graph_c0	--	Biological Process: protein N-linked glycosylation (GO:0006487);; Cellular Component: integral component of membrane (GO:0016021);; Biological Process: N-glycan fucosylation (GO:0036071);; Molecular Function: alpha-(1->6)-fucosyltransferase activity (GO:0046921);;	--	--	coatomer protein [Medicago truncatula]
48	c62664.graph_c0	--	--	--	--	hypothetical protein TanjilG_27238 [Lupinus angustifolius]
49	c50058.graph_c0	--	--	--	--	hypothetical protein L195_g036759 [Trifolium pratense]
50	c61282.graph_c0	Mobilome: prophages, transposons	--	--	General function prediction only	PREDICTED: uncharacterized protein LOC105852809 [Cicer arietinum]
51	c22061.graph_c0	--	Cellular Component: nucleus (GO:0005634);; Biological Process: entrainment of circadian clock (GO:0009649);; Biological Process: regulation of flower development (GO:0009909);; Biological Process: red or far-red light signaling pathway (GO:0010017);; Biological Process: response to red light (GO:0010114);; Biological Process: positive regulation of circadian rhythm (GO:0042753);; Molecular Functi…	--	--	early flowering 4 [Pisum sativum]
52	c60933.graph_c1	--	Biological Process: cell fate specification (GO:0001708);; Cellular Component: nucleus (GO:0005634);; Biological Process: regulation of transcription, DNA-templated (GO:0006355);; Biological Process: xylem and phloem pattern formation (GO:0010051);; Biological Process: xylem development (GO:0010089);; Molecular Function: sequence-specific DNA binding (GO:0043565);;	--	Transcription	knotted I class homeodomain protein, partial [Pisum sativum]
53	c54243.graph_c0	--	Cellular Component: nucleus (GO:0005634);; Biological Process: regulation of transcription, DNA-templated (GO:0006355);; Biological Process: regulation of meristem structural organization (GO:0009934);; Molecular Function: sequence-specific DNA binding (GO:0043565);; Biological Process: carpel development (GO:0048440);;	--	Transcription	Knox class 1 protein [Pisum sativum]
54	c38497.graph_c0	--	--	--	--	CCT motif protein [Medicago truncatula]
55	c57250.graph_c0	Defense mechanisms	Molecular Function: ATP binding (GO:0005524);; Biological Process: drug transmembrane transport (GO:0006855);; Molecular Function: xenobiotic-transporting ATPase activity (GO:0008559);; Cellular Component: integral component of membrane (GO:0016021);; Biological Process: xenobiotic transport (GO:0042908);;	K05658|0|mtr:MTR_6g088670|K05658 ATP-binding cassette, subfamily B (MDR/TAP), member 1 [EC:3.6.3.44] | (RefSeq) ABC transporter B family protein	Secondary metabolites biosynthesis, transport and catabolism	ABC transporter B family protein [Medicago truncatula]
