# Supplementary material for: Integrative Analyses of Transcriptomes and Metabolomes Reveal Associated Genes and Metabolites with Flowering Regulation in Common Vetch (Vicia sativa L.)
Source: Int J Mol Sci. 2022 Jun 19;23(12):6818. doi: 10.3390/ijms23126818 (PMC9224626; doi:10.3390/ijms23126818)
Supplement: Supplementary file 1 [file ijms-23-06818-s001.zip › Table S4.xlsx]

## Sheet: Sheet1
Table S4. Annotation information of differential metabolites in the KEGG database.
ID	Name	KEGG_annotation	KEGG_pathway_annotation
meta_67	Dihydroxyacetone	C00184	Glycerolipid metabolism(ko00561);;Metabolic pathways(ko01100);;Carbon metabolism(ko01200)
meta_78	--	--	--
meta_97	Acetohydroxamic acid	--	--
meta_216	--	--	--
meta_222	Pyruvate	C00022	Carbon fixation in photosynthetic organisms(ko00710);;2-Oxocarboxylic acid metabolism(ko01210);;Thiamine metabolism(ko00730);;Tyrosine metabolism(ko00350);;Phenylalanine metabolism(ko00360);;Biosynthesis of secondary metabolites(ko01110);;Cysteine and methionine metabolism(ko00270);;Metabolic pathways(ko01100);;Citrate cycle (TCA cycle)(ko00020);;Glycolysis / Gluconeogenesis(ko00010);;Ascorbate a…
meta_255	3-Hydroxypropionic acid (beta-lactic acid)	--	--
meta_256	D-Lactic acid	C00256	Glycolysis / Gluconeogenesis(ko00010);;Fructose and mannose metabolism(ko00051);;Metabolic pathways(ko01100);;Pyruvate metabolism(ko00620);;Propanoate metabolism(ko00640);;Biosynthesis of secondary metabolites(ko01110);;Vancomycin resistance(ko01502)
meta_293	Phenol	C00146	Tyrosine metabolism(ko00350)
meta_352	--	--	--
meta_438	--	--	--
meta_452	--	--	--
meta_506	resorcinol	--	--
meta_507	--	--	--
meta_508	Pyrocatechol	C00090	Metabolic pathways(ko01100)
meta_520	Beta-Alanine	C00099	Pantothenate and CoA biosynthesis(ko00770);;Biosynthesis of secondary metabolites(ko01110);;Propanoate metabolism(ko00640);;beta-Alanine metabolism(ko00410);;Metabolic pathways(ko01100);;Pyrimidine metabolism(ko00240)
meta_557	--	--	--
meta_603	Creatinine	C00791	Arginine and proline metabolism(ko00330);;Metabolic pathways(ko01100)
meta_612	Maleamic acid	C01596	Nicotinate and nicotinamide metabolism(ko00760)
meta_619	--	--	--
meta_622	--	--	--
meta_624	L-Proline	C00148	Carbapenem biosynthesis(ko00332);;Metabolic pathways(ko01100);;ABC transporters(ko02010);;Biosynthesis of amino acids(ko01230);;Biosynthesis of secondary metabolites(ko01110);;Arginine and proline metabolism(ko00330);;Aminoacyl-tRNA biosynthesis(ko00970)
meta_634	--	--	--
meta_640	Maleic acid	C01384	Butanoate metabolism(ko00650);;Nicotinate and nicotinamide metabolism(ko00760);;Tyrosine metabolism(ko00350)
meta_645	--	--	--
meta_670	Acetylglycine	--	--
meta_676	Indole	C00463	Biosynthesis of secondary metabolites(ko01110);;Tryptophan metabolism(ko00380);;Phenylalanine, tyrosine and tryptophan biosynthesis(ko00400);;Benzoxazinoid biosynthesis(ko00402);;Metabolic pathways(ko01100)
meta_701	Methylmalonic acid	C02170	Propanoate metabolism(ko00640);;Valine, leucine and isoleucine degradation(ko00280);;Pyrimidine metabolism(ko00240)
meta_714	3-Hydroxyisovaleric acid	--	--
meta_729	L-Threonine	C00188	Metabolic pathways(ko01100);;ABC transporters(ko02010);;Glycine, serine and threonine metabolism(ko00260);;Porphyrin and chlorophyll metabolism(ko00860);;Biosynthesis of amino acids(ko01230);;Valine, leucine and isoleucine biosynthesis(ko00290);;Monobactam biosynthesis(ko00261);;Biosynthesis of secondary metabolites(ko01110);;Aminoacyl-tRNA biosynthesis(ko00970)
meta_747	--	--	--
meta_755	2-(4-Hydroxyphenyl)ethanol	C06044	Tyrosine metabolism(ko00350)
meta_756	--	--	--
meta_757	--	--	--
meta_811	--	--	--
meta_818	Taurine	C00245	Metabolic pathways(ko01100);;ABC transporters(ko02010);;Sulfur metabolism(ko00920);;Taurine and hypotaurine metabolism(ko00430)
meta_839	Thymine	C00178	Metabolic pathways(ko01100);;Pyrimidine metabolism(ko00240)
meta_867	5-Amino-4-carbamoylimidazole (AICA)	--	--
meta_899	--	--	--
meta_912	Ammelide	--	--
meta_913	L-Pyroglutamic acid	C01879	Glutathione metabolism(ko00480)
meta_918	L-Pipecolic acid	C00408	Lysine degradation(ko00310);;Metabolic pathways(ko01100);;Biosynthesis of secondary metabolites(ko01110);;Tropane, piperidine and pyridine alkaloid biosynthesis(ko00960)
meta_934	Cyanuric acid	C06554	Metabolic pathways(ko01100)
meta_939	--	--	--
meta_945	alpha-Ketocaproic acid	--	--
meta_947	Dihydroxyfumarate	C00975	Glyoxylate and dicarboxylate metabolism(ko00630)
meta_976	3-Methyl-2-oxopentanoate	--	--
meta_981	L-Leucine	C00123	2-Oxocarboxylic acid metabolism(ko01210);;Aminoacyl-tRNA biosynthesis(ko00970);;Valine, leucine and isoleucine degradation(ko00280);;Biosynthesis of amino acids(ko01230);;Valine, leucine and isoleucine biosynthesis(ko00290);;Biosynthesis of secondary metabolites(ko01110);;Metabolic pathways(ko01100);;Glucosinolate biosynthesis(ko00966);;ABC transporters(ko02010)
meta_984	--	--	--
meta_1003	L-Asparagine	C00152	Biosynthesis of amino acids(ko01230);;Biosynthesis of secondary metabolites(ko01110);;Alanine, aspartate and glutamate metabolism(ko00250);;Aminoacyl-tRNA biosynthesis(ko00970);;Metabolic pathways(ko01100);;Cyanoamino acid metabolism(ko00460)
meta_1009	Hydroxyisocaproic acid	--	--
meta_1011	--	--	--
meta_1013	--	--	--
meta_1065	L-Malic acid	C00149	Glyoxylate and dicarboxylate metabolism(ko00630);;Metabolic pathways(ko01100);;Carbon metabolism(ko01200);;Carbon fixation in photosynthetic organisms(ko00710);;Citrate cycle (TCA cycle)(ko00020);;Pyruvate metabolism(ko00620);;Biosynthesis of secondary metabolites(ko01110)
meta_1092	Adenine	C00147	Metabolic pathways(ko01100);;Purine metabolism(ko00230);;Zeatin biosynthesis(ko00908)
meta_1116	Gentisic acid	C00628	Tyrosine metabolism(ko00350);;Metabolic pathways(ko01100)
meta_1120	L-Threonate	C01620	Ascorbate and aldarate metabolism(ko00053)
meta_1125	Glycolate	C00160	Biosynthesis of secondary metabolites(ko01110);;Metabolic pathways(ko01100);;Carbon metabolism(ko01200);;Glyoxylate and dicarboxylate metabolism(ko00630)
meta_1130	--	--	--
meta_1134	Propylene glycol	C00583	Propanoate metabolism(ko00640)
meta_1164	Tyramine	C00483	Tyrosine metabolism(ko00350);;Biosynthesis of secondary metabolites(ko01110);;Isoquinoline alkaloid biosynthesis(ko00950)
meta_1183	Salicylic acid	C00805	Biosynthesis of secondary metabolites(ko01110);;Phenylalanine metabolism(ko00360);;Plant hormone signal transduction(ko04075);;Metabolic pathways(ko01100)
meta_1249	Ethosuximide	--	--
meta_1260	2-Oxoadipic acid	C00322	Lysine biosynthesis(ko00300);;Metabolic pathways(ko01100);;Lysine degradation(ko00310);;2-Oxocarboxylic acid metabolism(ko01210);;Tryptophan metabolism(ko00380);;Biosynthesis of amino acids(ko01230)
meta_1290	Hydroxyhydroquinone	C02814	Metabolic pathways(ko01100)
meta_1291	--	--	--
meta_1310	3-Butynoic acid	--	--
meta_1317	Pyruvaldehyde	C00546	Glycine, serine and threonine metabolism(ko00260);;Propanoate metabolism(ko00640);;Pyruvate metabolism(ko00620)
meta_1353	--	--	--
meta_1383	L-Glutamine	C00064	Alanine, aspartate and glutamate metabolism(ko00250);;Metabolic pathways(ko01100);;ABC transporters(ko02010);;Pyrimidine metabolism(ko00240);;Glyoxylate and dicarboxylate metabolism(ko00630);;Nitrogen metabolism(ko00910);;Arginine biosynthesis(ko00220);;Aminoacyl-tRNA biosynthesis(ko00970);;Biosynthesis of amino acids(ko01230);;Purine metabolism(ko00230)
meta_1401	L-Glutamate	C00025	Carbon metabolism(ko01200);;Porphyrin and chlorophyll metabolism(ko00860);;Arginine and proline metabolism(ko00330);;Aminoacyl-tRNA biosynthesis(ko00970);;Biosynthesis of amino acids(ko01230);;Taurine and hypotaurine metabolism(ko00430);;Histidine metabolism(ko00340);;Glyoxylate and dicarboxylate metabolism(ko00630);;Carbapenem biosynthesis(ko00332);;Glutathione metabolism(ko00480);;2-Oxocarboxyl…
meta_1410	--	--	--
meta_1429	--	--	--
meta_1459	trans-cinnamate	C00423	Ubiquinone and other terpenoid-quinone biosynthesis(ko00130);;Phenylpropanoid biosynthesis(ko00940);;Metabolic pathways(ko01100);;Biosynthesis of secondary metabolites(ko01110);;Phenylalanine metabolism(ko00360)
meta_1479	DL-lactate	--	--
meta_1515	--	--	--
meta_1538	6-Mercaptopurine	--	--
meta_1583	Glycerol 3-phosphate	--	--
meta_1587	3,4-Dihydroxybenzoate (Protocatechuic acid)	--	--
meta_1591	--	--	--
meta_1625	L-Histidine	C00135	Metabolic pathways(ko01100);;ABC transporters(ko02010);;beta-Alanine metabolism(ko00410);;Aminoacyl-tRNA biosynthesis(ko00970);;Biosynthesis of amino acids(ko01230);;Biosynthesis of secondary metabolites(ko01110);;Histidine metabolism(ko00340)
meta_1671	--	--	--
meta_1696	Allantoin	--	--
meta_1699	--	--	--
meta_1728	Methylthiouracil	--	--
meta_1738	--	--	--
meta_1740	Acetyl-DL-Valine	--	--
meta_1762	--	--	--
meta_1768	--	--	--
meta_1772	--	--	--
meta_1801	DL-2-Aminoadipic acid	C00956	2-Oxocarboxylic acid metabolism(ko01210);;Lysine biosynthesis(ko00300);;Metabolic pathways(ko01100);;Lysine degradation(ko00310);;Biosynthesis of secondary metabolites(ko01110);;Biosynthesis of amino acids(ko01230)
meta_1826	--	--	--
meta_1830	4-Hydroxyphenylpyruvate	C01179	2-Oxocarboxylic acid metabolism(ko01210);;Ubiquinone and other terpenoid-quinone biosynthesis(ko00130);;Tyrosine metabolism(ko00350);;Biosynthesis of amino acids(ko01230);;Monobactam biosynthesis(ko00261);;Biosynthesis of secondary metabolites(ko01110);;Metabolic pathways(ko01100);;Isoquinoline alkaloid biosynthesis(ko00950);;Phenylalanine, tyrosine and tryptophan biosynthesis(ko00400)
meta_1836	3-Hydorxy-3-methylglutaric acid	--	--
meta_1914	4-Hydroxycinnamic acid	C00811	Isoquinoline alkaloid biosynthesis(ko00950);;Phenylalanine metabolism(ko00360);;Biosynthesis of secondary metabolites(ko01110);;Metabolic pathways(ko01100);;Phenylpropanoid biosynthesis(ko00940);;Ubiquinone and other terpenoid-quinone biosynthesis(ko00130);;Tyrosine metabolism(ko00350)
meta_1915	trans-2-Hydroxycinnamic acid	C01772	Biosynthesis of secondary metabolites(ko01110);;Phenylalanine metabolism(ko00360);;Phenylpropanoid biosynthesis(ko00940)
meta_1916	D(-)-beta-hydroxy butyric acid	--	--
meta_1922	O-Acetyl-L-serine	C00979	Carbon metabolism(ko01200);;Biosynthesis of amino acids(ko01230);;Sulfur metabolism(ko00920);;Biosynthesis of secondary metabolites(ko01110);;Cysteine and methionine metabolism(ko00270);;Metabolic pathways(ko01100);;Zeatin biosynthesis(ko00908);;Sulfur relay system(ko04122)
meta_1940	L-Phenylalanine	C00079	Phenylalanine metabolism(ko00360);;Biosynthesis of amino acids(ko01230);;Biosynthesis of secondary metabolites(ko01110);;Tropane, piperidine and pyridine alkaloid biosynthesis(ko00960);;Aminoacyl-tRNA biosynthesis(ko00970);;2-Oxocarboxylic acid metabolism(ko01210);;Phenylalanine, tyrosine and tryptophan biosynthesis(ko00400);;Phenylpropanoid biosynthesis(ko00940);;Metabolic pathways(ko01100);;Glu…
meta_1969	--	--	--
meta_1972	--	--	--
meta_2001	Vanillic acid	--	--
meta_2048	--	--	--
meta_2064	--	--	--
meta_2066	--	--	--
meta_2093	--	--	--
meta_2115	3-Dehydroshikimic acid	--	--
meta_2131	--	--	--
meta_2133	--	--	--
meta_2134	--	--	--
meta_2136	--	--	--
meta_2159	--	--	--
meta_2161	--	--	--
meta_2171	Acetyl-DL-Leucine	--	--
meta_2204	Dihydrouracil	C00429	Pantothenate and CoA biosynthesis(ko00770);;Pyrimidine metabolism(ko00240);;beta-Alanine metabolism(ko00410);;Metabolic pathways(ko01100)
meta_2211	Suberic acid	--	--
meta_2247	--	--	--
meta_2249	L-Citrulline	C00327	Metabolic pathways(ko01100);;Biosynthesis of amino acids(ko01230);;Biosynthesis of secondary metabolites(ko01110);;Arginine biosynthesis(ko00220)
meta_2268	L-Ascorbic acid	C00072	Biosynthesis of secondary metabolites(ko01110);;Ascorbate and aldarate metabolism(ko00053);;Glutathione metabolism(ko00480);;Metabolic pathways(ko01100)
meta_2276	--	--	--
meta_2307	N-Formylmethionine	C03145	Cysteine and methionine metabolism(ko00270)
meta_2334	D-Glucono-1,5-lactone	C00198	Metabolic pathways(ko01100);;Carbon metabolism(ko01200);;Biosynthesis of secondary metabolites(ko01110);;Pentose phosphate pathway(ko00030)
meta_2335	--	--	--
meta_2386	Caffeic Acid	C01197	Phenylpropanoid biosynthesis(ko00940);;Metabolic pathways(ko01100);;Biosynthesis of secondary metabolites(ko01110)
meta_2394	D-Fructose	C00095	Starch and sucrose metabolism(ko00500);;Metabolic pathways(ko01100);;Fructose and mannose metabolism(ko00051);;ABC transporters(ko02010);;Galactose metabolism(ko00052)
meta_2442	--	--	--
meta_2452	D-Sorbitol	C00794	Galactose metabolism(ko00052);;ABC transporters(ko02010);;Fructose and mannose metabolism(ko00051);;Metabolic pathways(ko01100)
meta_2481	--	--	--
meta_2493	--	--	--
meta_2519	--	--	--
meta_2520	--	--	--
meta_2613	--	--	--
meta_2616	alpha-N-Acetyl-L-glutamine	--	--
meta_2619	Azelaic acid	--	--
meta_2640	Kynurenic acid	C01717	Tryptophan metabolism(ko00380);;Metabolic pathways(ko01100)
meta_2642	N-Acetyl-L-glutamate	C00624	2-Oxocarboxylic acid metabolism(ko01210);;Metabolic pathways(ko01100);;Biosynthesis of secondary metabolites(ko01110);;Biosynthesis of amino acids(ko01230);;Arginine biosynthesis(ko00220)
meta_2646	3-Indolepropionic acid	--	--
meta_2650	--	--	--
meta_2667	--	--	--
meta_2712	N-Acetyl-DL-methionine	--	--
meta_2719	Creatine	C00300	Metabolic pathways(ko01100);;Glycine, serine and threonine metabolism(ko00260);;Arginine and proline metabolism(ko00330)
meta_2735	D-Galactarate	C00818	Ascorbate and aldarate metabolism(ko00053);;Metabolic pathways(ko01100)
meta_2815	Scytalone	--	--
meta_2816	Ferulic acid	C01494	Metabolic pathways(ko01100);;Phenylpropanoid biosynthesis(ko00940);;Biosynthesis of secondary metabolites(ko01110)
meta_2823	2'-Deoxy-D-ribose	C01801	Pentose phosphate pathway(ko00030)
meta_2825	Phenylacetylglycine	C05598	Phenylalanine metabolism(ko00360)
meta_2864	--	--	--
meta_2899	--	--	--
meta_2902	--	--	--
meta_2947	--	--	--
meta_2952	--	--	--
meta_2985	6-Hydroxynicotinic acid	C01020	Nicotinate and nicotinamide metabolism(ko00760)
meta_3001	--	--	--
meta_3023	--	--	--
meta_3031	--	--	--
meta_3044	--	--	--
meta_3070	O-Succinyl-L-homoserine	C01118	Cysteine and methionine metabolism(ko00270);;Metabolic pathways(ko01100);;Biosynthesis of secondary metabolites(ko01110);;Biosynthesis of amino acids(ko01230);;Sulfur metabolism(ko00920)
meta_3100	5-Hydroxymethyluracil	--	--
meta_3104	--	--	--
meta_3138	Acetylcarnitine	--	--
meta_3159	L-Iditol	--	--
meta_3161	L-Tryptophan	C00078	Glycine, serine and threonine metabolism(ko00260);;Glucosinolate biosynthesis(ko00966);;Metabolic pathways(ko01100);;Phenylalanine, tyrosine and tryptophan biosynthesis(ko00400);;2-Oxocarboxylic acid metabolism(ko01210);;Biosynthesis of secondary metabolites(ko01110);;Tryptophan metabolism(ko00380);;Biosynthesis of amino acids(ko01230);;Aminoacyl-tRNA biosynthesis(ko00970);;Indole alkaloid biosyn…
meta_3165	--	--	--
meta_3191	Isobutyrylglycine	--	--
meta_3251	--	--	--
meta_3258	N-Acetyl-L-phenylalanine	C03519	Phenylalanine metabolism(ko00360)
meta_3356	N-Benzyloxycarbonylglycine	--	--
meta_3362	--	--	--
meta_3366	3-Hydroxycapric acid	--	--
meta_3368	--	--	--
meta_3375	--	--	--
meta_3474	--	--	--
meta_3517	--	--	--
meta_3545	sn-Glycerol 3-phosphoethanolamine	--	--
meta_3588	--	--	--
meta_3610	--	--	--
meta_3688	Carbamazepine	--	--
meta_3724	Pantothenate	C00864	Pantothenate and CoA biosynthesis(ko00770);;Biosynthesis of secondary metabolites(ko01110);;Metabolic pathways(ko01100);;beta-Alanine metabolism(ko00410)
meta_3725	--	--	--
meta_3823	Allocystathionine	--	--
meta_3824	--	--	--
meta_3831	N-Acetyl-D-glucosamine	C00140	ABC transporters(ko02010);;Metabolic pathways(ko01100);;Amino sugar and nucleotide sugar metabolism(ko00520)
meta_3856	--	--	--
meta_3886	--	--	--
meta_3962	7-Methylxanthine	C16353	Caffeine metabolism(ko00232);;Biosynthesis of secondary metabolites(ko01110);;Metabolic pathways(ko01100)
meta_3966	--	--	--
meta_3974	--	--	--
meta_4032	2'-Deoxyuridine	C00526	Pyrimidine metabolism(ko00240)
meta_4045	Traumatic Acid	C16308	Biosynthesis of secondary metabolites(ko01110);;alpha-Linolenic acid metabolism(ko00592)
meta_4117	--	--	--
meta_4122	--	--	--
meta_4125	--	--	--
meta_4137	--	--	--
meta_4138	--	--	--
meta_4152	--	--	--
meta_4206	--	--	--
meta_4212	--	--	--
meta_4219	--	--	--
meta_4259	--	--	--
meta_4357	3-Isopropylmalate	C04411	Biosynthesis of amino acids(ko01230);;Valine, leucine and isoleucine biosynthesis(ko00290);;Biosynthesis of secondary metabolites(ko01110);;2-Oxocarboxylic acid metabolism(ko01210);;Metabolic pathways(ko01100)
meta_4378	--	--	--
meta_4408	--	--	--
meta_4429	--	--	--
meta_4434	--	--	--
meta_4442	--	--	--
meta_4508	--	--	--
meta_4517	--	--	--
meta_4526	D-Allose	C01487	Fructose and mannose metabolism(ko00051);;ABC transporters(ko02010)
meta_4530	--	--	--
meta_4571	trans-Zeatin	C00371	Biosynthesis of secondary metabolites(ko01110);;Plant hormone signal transduction(ko04075);;Metabolic pathways(ko01100);;Zeatin biosynthesis(ko00908)
meta_4595	alpha-D-Glucose 1-phosphate	C00103	Starch and sucrose metabolism(ko00500);;Glycolysis / Gluconeogenesis(ko00010);;Metabolic pathways(ko01100);;Biosynthesis of secondary metabolites(ko01110);;Pentose and glucuronate interconversions(ko00040);;Amino sugar and nucleotide sugar metabolism(ko00520);;Galactose metabolism(ko00052)
meta_4603	--	--	--
meta_4609	--	--	--
meta_4616	Thymidine	C00214	Pyrimidine metabolism(ko00240);;Metabolic pathways(ko01100)
meta_4623	--	--	--
meta_4651	--	--	--
meta_4691	--	--	--
meta_4695	--	--	--
meta_4711	Nicotinamide	C00153	Metabolic pathways(ko01100);;Nicotinate and nicotinamide metabolism(ko00760)
meta_4719	--	--	--
meta_4728	--	--	--
meta_4753	--	--	--
meta_4796	--	--	--
meta_4812	AFMK	C05642	Tryptophan metabolism(ko00380)
meta_4815	Ellipticine	--	--
meta_4856	(S)-Naproxen	--	--
meta_4928	Pyridoxine 5-phosphate	C00627	Metabolic pathways(ko01100);;Vitamin B6 metabolism(ko00750)
meta_5002	--	--	--
meta_5014	Isocitrate	C00311	Glyoxylate and dicarboxylate metabolism(ko00630);;2-Oxocarboxylic acid metabolism(ko01210);;Citrate cycle (TCA cycle)(ko00020);;Carbon metabolism(ko01200);;Metabolic pathways(ko01100);;Biosynthesis of secondary metabolites(ko01110);;Biosynthesis of amino acids(ko01230)
meta_5022	--	--	--
meta_5029	--	--	--
meta_5031	--	--	--
meta_5035	--	--	--
meta_5084	--	--	--
meta_5097	D-galacturonic acid	C00333	Ascorbate and aldarate metabolism(ko00053);;Pentose and glucuronate interconversions(ko00040);;Amino sugar and nucleotide sugar metabolism(ko00520);;Metabolic pathways(ko01100);;ABC transporters(ko02010)
meta_5103	--	--	--
meta_5162	--	--	--
meta_5192	Pinocembrin	C09827	Flavonoid biosynthesis(ko00941)
meta_5198	5'-O-methylthymidine	--	--
meta_5207	--	--	--
meta_5287	3-Methyluridine	--	--
meta_5301	--	--	--
meta_5368	--	--	--
meta_5389	--	--	--
meta_5403	--	--	--
meta_5438	Bufexamac	--	--
meta_5468	--	--	--
meta_5487	Hydroxyproline	C01157	Metabolic pathways(ko01100);;Arginine and proline metabolism(ko00330)
meta_5546	--	--	--
meta_5554	--	--	--
meta_5628	--	--	--
meta_5633	--	--	--
meta_5637	D-Biotin	C00120	Metabolic pathways(ko01100);;Biotin metabolism(ko00780);;ABC transporters(ko02010)
meta_5644	--	--	--
meta_5647	--	--	--
meta_5712	--	--	--
meta_5716	--	--	--
meta_5718	--	--	--
meta_5807	--	--	--
meta_5808	--	--	--
meta_5833	Sulfamethizole	--	--
meta_5888	--	--	--
meta_5889	(-)-Naringenin	C00509	Metabolic pathways(ko01100);;Biosynthesis of secondary metabolites(ko01110);;Flavonoid biosynthesis(ko00941);;Isoflavonoid biosynthesis(ko00943)
meta_5893	Arbutin	C06186	Glycolysis / Gluconeogenesis(ko00010)
meta_5912	--	--	--
meta_5945	--	--	--
meta_5966	1-Deoxy-D-xylulose 5-phosphate	C11437	Metabolic pathways(ko01100);;Thiamine metabolism(ko00730);;Terpenoid backbone biosynthesis(ko00900);;Biosynthesis of secondary metabolites(ko01110)
meta_5967	2-Deoxyribose 5-phosphate	C00673	Pentose phosphate pathway(ko00030)
meta_5975	Phloretin	--	--
meta_5998	--	--	--
meta_6001	--	--	--
meta_6078	L-Saccharopine	C00449	Biosynthesis of secondary metabolites(ko01110);;Biosynthesis of amino acids(ko01230);;Lysine biosynthesis(ko00300);;Lysine degradation(ko00310);;Metabolic pathways(ko01100)
meta_6087	Stearidonic Acid	C16300	alpha-Linolenic acid metabolism(ko00592);;Biosynthesis of secondary metabolites(ko01110)
meta_6118	Prunasin	C00844	Biosynthesis of secondary metabolites(ko01110);;Cyanoamino acid metabolism(ko00460)
meta_6124	--	--	--
meta_6126	--	--	--
meta_6148	2-C-Methyl-D-erythritol 2,4-cyclodiphosphate	C11453	Metabolic pathways(ko01100);;Terpenoid backbone biosynthesis(ko00900);;Biosynthesis of secondary metabolites(ko01110)
meta_6163	--	--	--
meta_6176	--	--	--
meta_6192	all cis-(6,9,12)-Linolenic acid	--	--
meta_6244	--	--	--
meta_6254	--	--	--
meta_6262	Sulfamethoxypyridazine	--	--
meta_6270	Acadesine (Drug)	--	--
meta_6289	--	--	--
meta_6294	--	--	--
meta_6299	Linoleic acid	C01595	Metabolic pathways(ko01100);;Linoleic acid metabolism(ko00591);;Biosynthesis of unsaturated fatty acids(ko01040)
meta_6360	--	--	--
meta_6361	Temazepam	--	--
meta_6364	--	--	--
meta_6373	--	--	--
meta_6374	Ethyl glucuronide	--	--
meta_6382	--	--	--
meta_6484	--	--	--
meta_6485	4'-Hydroxychalcone	--	--
meta_6493	--	--	--
meta_6522	Xanthosine	C01762	Metabolic pathways(ko01100);;Purine metabolism(ko00230);;Biosynthesis of secondary metabolites(ko01110);;Caffeine metabolism(ko00232)
meta_6530	--	--	--
meta_6565	Kaempferol	C05903	Biosynthesis of secondary metabolites(ko01110);;Flavonoid biosynthesis(ko00941);;Flavone and flavonol biosynthesis(ko00944);;Metabolic pathways(ko01100)
meta_6578	--	--	--
meta_6593	--	--	--
meta_6634	--	--	--
meta_6678	--	--	--
meta_6693	--	--	--
meta_6695	--	--	--
meta_6698	--	--	--
meta_6756	--	--	--
meta_6791	Argininosuccinic acid	--	--
meta_6877	--	--	--
meta_6880	--	--	--
meta_6887	--	--	--
meta_6893	--	--	--
meta_6906	--	--	--
meta_6970	--	--	--
meta_6975	--	--	--
meta_6976	--	--	--
meta_6990	--	--	--
meta_7086	--	--	--
meta_7106	p-Hydroxycinnamaldehyde	C05608	Phenylpropanoid biosynthesis(ko00940);;Metabolic pathways(ko01100);;Biosynthesis of secondary metabolites(ko01110)
meta_7116	--	--	--
meta_7118	Mevalonic acid	C00418	Biosynthesis of secondary metabolites(ko01110);;Terpenoid backbone biosynthesis(ko00900);;Metabolic pathways(ko01100)
meta_7125	9(S)-HODE	C14767	Linoleic acid metabolism(ko00591)
meta_7196	--	--	--
meta_7203	--	--	--
meta_7215	--	--	--
meta_7219	--	--	--
meta_7220	--	--	--
meta_7222	--	--	--
meta_7226	--	--	--
meta_7229	--	--	--
meta_7243	Nname,cis-9,10-Epoxystearic acid	--	--
meta_7276	3'-O-Methylinosine	--	--
meta_7316	Diosmetin	--	--
meta_7322	--	--	--
meta_7323	Phenolphthalein	--	--
meta_7329	--	--	--
meta_7334	Salidroside	C06046	Tyrosine metabolism(ko00350)
meta_7341	--	--	--
meta_7359	--	--	--
meta_7360	N-Acetylglucosamine 1-phosphate	--	--
meta_7362	--	--	--
meta_7409	--	--	--
meta_7414	Quercetin	C00389	Metabolic pathways(ko01100);;Biosynthesis of secondary metabolites(ko01110);;Flavone and flavonol biosynthesis(ko00944);;Flavonoid biosynthesis(ko00941)
meta_7416	--	--	--
meta_7435	Fenoprofen	--	--
meta_7442	--	--	--
meta_7448	--	--	--
meta_7469	--	--	--
meta_7476	--	--	--
meta_7494	--	--	--
meta_7502	--	--	--
meta_7525	(+-)-Taxifolin	--	--
meta_7532	Oxypurinol	--	--
meta_7542	--	--	--
meta_7556	--	--	--
meta_7557	--	--	--
meta_7561	--	--	--
meta_7564	--	--	--
meta_7591	Cytidine 2',3'-cyclic phosphate	--	--
meta_7640	--	--	--
meta_7665	--	--	--
meta_7669	--	--	--
meta_7737	--	--	--
meta_7740	--	--	--
meta_7748	--	--	--
meta_7753	Phenylbutazone	--	--
meta_7762	--	--	--
meta_7783	--	--	--
meta_7796	--	--	--
meta_7823	--	--	--
meta_7843	--	--	--
meta_7844	--	--	--
meta_7846	--	--	--
meta_7850	--	--	--
meta_7854	--	--	--
meta_7880	--	--	--
meta_7885	Acetyl Tyrosine Ethyl Ester	--	--
meta_7917	Orotate	C00295	Metabolic pathways(ko01100);;Pyrimidine metabolism(ko00240)
meta_7925	--	--	--
meta_7926	--	--	--
meta_7937	--	--	--
meta_7943	--	--	--
meta_7952	--	--	--
meta_7959	--	--	--
meta_8042	--	--	--
meta_8054	--	--	--
meta_8058	--	--	--
meta_8060	--	--	--
meta_8127	--	--	--
meta_8152	--	--	--
meta_8154	--	--	--
meta_8157	--	--	--
meta_8163	Phthalic acid Mono-2-ethylhexyl Ester	--	--
meta_8164	--	--	--
meta_8177	--	--	--
meta_8209	--	--	--
meta_8219	--	--	--
meta_8249	--	--	--
meta_8277	--	--	--
meta_8373	--	--	--
meta_8379	--	--	--
meta_8380	--	--	--
meta_8382	--	--	--
meta_8445	Phenethyl Caffeiate	--	--
meta_8450	--	--	--
meta_8459	--	--	--
meta_8465	--	--	--
meta_8470	--	--	--
meta_8474	--	--	--
meta_8539	--	--	--
meta_8542	--	--	--
meta_8550	p-Hydroxyphenylbutazone	--	--
meta_8561	Hexadecanedioic acid	--	--
meta_8567	--	--	--
meta_8636	--	--	--
meta_8637	--	--	--
meta_8638	--	--	--
meta_8643	Maltitol	--	--
meta_8654	--	--	--
meta_8726	--	--	--
meta_8765	--	--	--
meta_8766	--	--	--
meta_8779	Adenosine 3',5'-cyclic phosphate (cAMP)	--	--
meta_8827	--	--	--
meta_8836	Inosine 5'-monophosphate (IMP)	--	--
meta_8848	--	--	--
meta_8849	--	--	--
meta_8850	--	--	--
meta_8857	Acetylvalerenolic acid	--	--
meta_8887	--	--	--
meta_8911	--	--	--
meta_8941	--	--	--
meta_8943	D-Ribose 1,5-bisphosphate	C01151	Pentose phosphate pathway(ko00030)
meta_8965	--	--	--
meta_8999	--	--	--
meta_9046	Nicotinamide ribotide	--	--
meta_9072	--	--	--
meta_9073	--	--	--
meta_9134	--	--	--
meta_9138	--	--	--
meta_9141	beta-Nicotinamide D-ribonucleotide	C00455	Metabolic pathways(ko01100);;Nicotinate and nicotinamide metabolism(ko00760)
meta_9144	--	--	--
meta_9147	Flutamide	--	--
meta_9154	--	--	--
meta_9169	--	--	--
meta_9202	--	--	--
meta_9219	--	--	--
meta_9244	--	--	--
meta_9246	--	--	--
meta_9249	--	--	--
meta_9261	--	--	--
meta_9265	--	--	--
meta_9301	Topiramate	--	--
meta_9343	Hesperetin	C01709	Flavonoid biosynthesis(ko00941)
meta_9360	Propylthiouracil	--	--
meta_9361	--	--	--
meta_9363	--	--	--
meta_9367	Sophoraflavanone B	--	--
meta_9372	--	--	--
meta_9392	Norethindrone Acetate	--	--
meta_9499	Sucrose	C00089	Metabolic pathways(ko01100);;ABC transporters(ko02010);;Starch and sucrose metabolism(ko00500);;Galactose metabolism(ko00052)
meta_9503	alpha,alpha-Trehalose	C01083	Starch and sucrose metabolism(ko00500);;Metabolic pathways(ko01100);;ABC transporters(ko02010);;Biosynthesis of secondary metabolites(ko01110)
meta_9506	--	--	--
meta_9611	--	--	--
meta_9653	--	--	--
meta_9695	3',5'-Cyclic guanosine monophosphate	--	--
meta_9819	--	--	--
meta_9834	--	--	--
meta_9865	Shikimate	C00493	Biosynthesis of secondary metabolites(ko01110);;Biosynthesis of amino acids(ko01230);;Phenylalanine, tyrosine and tryptophan biosynthesis(ko00400);;Metabolic pathways(ko01100)
meta_9869	--	--	--
meta_9880	--	--	--
meta_9881	--	--	--
meta_9897	--	--	--
meta_9962	--	--	--
meta_9965	--	--	--
meta_9969	--	--	--
meta_9971	--	--	--
meta_9989	--	--	--
meta_9991	--	--	--
meta_9992	--	--	--
meta_9994	PGE3	--	--
meta_10004	--	--	--
meta_10031	--	--	--
meta_10082	--	--	--
meta_10092	--	--	--
meta_10096	5,6,7,8-tetrahydro-2-Naphthoic Acid	--	--
meta_10100	--	--	--
meta_10107	20-hydroxy LTB4	C04853	Arachidonic acid metabolism(ko00590)
meta_10125	Dicumarol	--	--
meta_10162	--	--	--
meta_10163	--	--	--
meta_10164	2'-Deoxyinosine 5'-monophosphate	C06196	Purine metabolism(ko00230)
meta_10183	--	--	--
meta_10204	--	--	--
meta_10252	--	--	--
meta_10268	--	--	--
meta_10274	Gulonolactone	C01040	Metabolic pathways(ko01100);;Ascorbate and aldarate metabolism(ko00053)
meta_10277	--	--	--
meta_10278	--	--	--
meta_10280	--	--	--
meta_10281	--	--	--
meta_10297	--	--	--
meta_10335	S-Methyl-5'-thioadenosine	C00170	Cysteine and methionine metabolism(ko00270);;Metabolic pathways(ko01100);;Zeatin biosynthesis(ko00908)
meta_10380	--	--	--
meta_10386	--	--	--
meta_10392	--	--	--
meta_10396	--	--	--
meta_10398	Matairesinol	C10682	Biosynthesis of secondary metabolites(ko01110)
meta_10406	--	--	--
meta_10410	5(S)-HETE	C04805	Arachidonic acid metabolism(ko00590)
meta_10417	5(S)-HpETE	C05356	Arachidonic acid metabolism(ko00590);;Metabolic pathways(ko01100)
meta_10437	--	--	--
meta_10444	--	--	--
meta_10491	--	--	--
meta_10496	Aspirin	--	--
meta_10505	--	--	--
meta_10514	Nitrendipine	--	--
meta_10560	--	--	--
meta_10611	--	--	--
meta_10634	--	--	--
meta_10642	Eicosapentaenoic Acid	C06428	Biosynthesis of unsaturated fatty acids(ko01040)
meta_10651	--	--	--
meta_10669	--	--	--
meta_10689	Dimethyl 4,4-o-Phenylene-Bis (3-Thiophanate)	--	--
meta_10724	--	--	--
meta_10725	--	--	--
meta_10800	--	--	--
meta_10804	--	--	--
meta_10831	--	--	--
meta_10834	--	--	--
meta_10835	DL-Normetanephrine	C05589	Metabolic pathways(ko01100);;Tyrosine metabolism(ko00350)
meta_10838	(4Z,7Z,10Z,13Z,16Z,19Z)-4,7,10,13,1 6,19-Docosahexaenoic acid	--	--
meta_10863	--	--	--
meta_10864	--	--	--
meta_10888	--	--	--
meta_10920	--	--	--
meta_10921	--	--	--
meta_10922	--	--	--
meta_10926	--	--	--
meta_10934	--	--	--
meta_10935	--	--	--
meta_10937	--	--	--
meta_10948	--	--	--
meta_11026	--	--	--
meta_11045	--	--	--
meta_11056	--	--	--
meta_11110	--	--	--
meta_11112	--	--	--
meta_11123	--	--	--
meta_11145	--	--	--
meta_11146	--	--	--
meta_11179	--	--	--
meta_11201	--	--	--
meta_11214	--	--	--
meta_11220	Dantrolene	--	--
meta_11232	--	--	--
meta_11241	--	--	--
meta_11273	--	--	--
meta_11309	--	--	--
meta_11343	--	--	--
meta_11347	--	--	--
meta_11351	--	--	--
meta_11379	--	--	--
meta_11415	--	--	--
meta_11444	--	--	--
meta_11451	--	--	--
meta_11452	--	--	--
meta_11526	--	--	--
meta_11536	Maltose	C00208	Starch and sucrose metabolism(ko00500);;ABC transporters(ko02010);;Metabolic pathways(ko01100)
meta_11553	--	--	--
meta_11558	--	--	--
meta_11563	--	--	--
meta_11565	--	--	--
meta_11566	--	--	--
meta_11609	--	--	--
meta_11665	--	--	--
meta_11669	--	--	--
meta_11673	--	--	--
meta_11676	--	--	--
meta_11747	--	--	--
meta_11752	--	--	--
meta_11769	--	--	--
meta_11773	--	--	--
meta_11810	--	--	--
meta_11811	--	--	--
meta_11841	--	--	--
meta_11842	--	--	--
meta_11845	--	--	--
meta_11872	--	--	--
meta_11878	--	--	--
meta_11968	--	--	--
meta_11974	--	--	--
meta_12018	--	--	--
meta_12032	--	--	--
meta_12042	--	--	--
meta_12043	--	--	--
meta_12044	--	--	--
meta_12048	Curcumin	C10443	Biosynthesis of secondary metabolites(ko01110);;Stilbenoid, diarylheptanoid and gingerol biosynthesis(ko00945)
meta_12053	--	--	--
meta_12136	--	--	--
meta_12137	--	--	--
meta_12147	--	--	--
meta_12163	--	--	--
meta_12166	--	--	--
meta_12168	--	--	--
meta_12256	--	--	--
meta_12273	--	--	--
meta_12281	--	--	--
meta_12357	--	--	--
meta_12366	pregnenolone sulfate	--	--
meta_12372	--	--	--
meta_12432	O-Phospho-L-threonine	C12147	Porphyrin and chlorophyll metabolism(ko00860)
meta_12435	--	--	--
meta_12449	--	--	--
meta_12459	--	--	--
meta_12463	Sunitinib	--	--
meta_12508	--	--	--
meta_12545	--	--	--
meta_12547	Fastigilin B	--	--
meta_12575	--	--	--
meta_12587	Aristolochic Acid	--	--
meta_12602	S-Adenosyl-L-homocysteine	C00021	Metabolic pathways(ko01100);;Cysteine and methionine metabolism(ko00270);;Biosynthesis of amino acids(ko01230)
meta_12625	Phenethicillin	--	--
meta_12654	--	--	--
meta_12659	--	--	--
meta_12671	--	--	--
meta_12689	--	--	--
meta_12690	--	--	--
meta_12695	--	--	--
meta_12749	--	--	--
meta_12761	Cortisol 21-acetate	--	--
meta_12786	--	--	--
meta_12790	--	--	--
meta_12839	--	--	--
meta_12860	--	--	--
meta_12861	--	--	--
meta_12889	--	--	--
meta_12904	--	--	--
meta_12929	--	--	--
meta_12961	--	--	--
meta_12962	--	--	--
meta_12963	--	--	--
meta_12994	--	--	--
meta_13034	--	--	--
meta_13048	Linustatin	--	--
meta_13050	alpha-Mangostin	--	--
meta_13086	--	--	--
meta_13092	--	--	--
meta_13147	--	--	--
meta_13148	--	--	--
meta_13160	Bisindolylmaleimide I	--	--
meta_13164	--	--	--
meta_13169	5(S),14(R)-Lipoxin B4	C06315	Arachidonic acid metabolism(ko00590)
meta_13232	--	--	--
meta_13241	--	--	--
meta_13260	--	--	--
meta_13280	--	--	--
meta_13318	--	--	--
meta_13321	--	--	--
meta_13338	--	--	--
meta_13345	--	--	--
meta_13355	--	--	--
meta_13362	--	--	--
meta_13387	--	--	--
meta_13441	--	--	--
meta_13442	--	--	--
meta_13460	--	--	--
meta_13469	--	--	--
meta_13471	--	--	--
meta_13476	--	--	--
meta_13477	--	--	--
meta_13482	--	--	--
meta_13502	--	--	--
meta_13506	--	--	--
meta_13540	--	--	--
meta_13542	--	--	--
meta_13544	--	--	--
meta_13553	--	--	--
meta_13566	--	--	--
meta_13570	--	--	--
meta_13577	--	--	--
meta_13588	--	--	--
meta_13654	--	--	--
meta_13676	--	--	--
meta_13715	--	--	--
meta_13753	--	--	--
meta_13759	--	--	--
meta_13776	Perseitol	--	--
meta_13784	--	--	--
meta_13788	--	--	--
meta_13823	--	--	--
meta_13951	--	--	--
meta_13961	--	--	--
meta_13969	--	--	--
meta_13974	--	--	--
meta_13975	--	--	--
meta_14048	--	--	--
meta_14054	--	--	--
meta_14059	--	--	--
meta_14063	--	--	--
meta_14064	--	--	--
meta_14065	--	--	--
meta_14067	--	--	--
meta_14080	alpha-Tocopherol (Vitamin E)	--	--
meta_14093	Isradipine	--	--
meta_14100	--	--	--
meta_14125	--	--	--
meta_14132	--	--	--
meta_14148	--	--	--
meta_14212	--	--	--
meta_14213	--	--	--
meta_14215	--	--	--
meta_14218	Naringenin-7-O-Glucoside	--	--
meta_14230	--	--	--
meta_14231	--	--	--
meta_14240	--	--	--
meta_14241	--	--	--
meta_14248	--	--	--
meta_14320	--	--	--
meta_14328	Phloridzin	--	--
meta_14345	--	--	--
meta_14378	--	--	--
meta_14385	--	--	--
meta_14413	--	--	--
meta_14434	--	--	--
meta_14450	--	--	--
meta_14458	--	--	--
meta_14459	--	--	--
meta_14462	--	--	--
meta_14480	--	--	--
meta_14538	--	--	--
meta_14541	--	--	--
meta_14545	Aminopterin	--	--
meta_14548	--	--	--
meta_14566	--	--	--
meta_14598	Troglitazone	--	--
meta_14602	--	--	--
meta_14637	--	--	--
meta_14652	--	--	--
meta_14660	--	--	--
meta_14661	--	--	--
meta_14664	--	--	--
meta_14720	--	--	--
meta_14721	--	--	--
meta_14738	--	--	--
meta_14838	--	--	--
meta_14839	--	--	--
meta_14842	--	--	--
meta_14858	--	--	--
meta_14868	--	--	--
meta_14877	--	--	--
meta_14905	--	--	--
meta_14906	--	--	--
meta_14929	--	--	--
meta_14934	--	--	--
meta_14935	--	--	--
meta_14936	--	--	--
meta_14967	--	--	--
meta_14973	--	--	--
meta_15007	--	--	--
meta_15016	--	--	--
meta_15017	--	--	--
meta_15018	--	--	--
meta_15019	--	--	--
meta_15027	--	--	--
meta_15036	--	--	--
meta_15038	--	--	--
meta_15069	--	--	--
meta_15070	--	--	--
meta_15101	--	--	--
meta_15114	--	--	--
meta_15115	--	--	--
meta_15117	--	--	--
meta_15124	--	--	--
meta_15125	--	--	--
meta_15128	--	--	--
meta_15129	--	--	--
meta_15145	--	--	--
meta_15149	--	--	--
meta_15154	--	--	--
meta_15177	1-Oleoyl-sn-glycerol 3-phosphate	--	--
meta_15188	--	--	--
meta_15204	--	--	--
meta_15207	--	--	--
meta_15213	--	--	--
meta_15217	--	--	--
meta_15223	--	--	--
meta_15227	--	--	--
meta_15290	--	--	--
meta_15311	--	--	--
meta_15377	--	--	--
meta_15392	--	--	--
meta_15394	Amygdalin	C08325	Biosynthesis of secondary metabolites(ko01110);;Cyanoamino acid metabolism(ko00460)
meta_15396	--	--	--
meta_15400	--	--	--
meta_15403	--	--	--
meta_15404	--	--	--
meta_15408	--	--	--
meta_15435	--	--	--
meta_15484	--	--	--
meta_15488	--	--	--
meta_15494	--	--	--
meta_15524	--	--	--
meta_15555	--	--	--
meta_15578	--	--	--
meta_15592	--	--	--
meta_15670	--	--	--
meta_15673	--	--	--
meta_15681	--	--	--
meta_15686	Adenosine 3',5'-diphosphate (PAP)	--	--
meta_15701	--	--	--
meta_15705	--	--	--
meta_15737	--	--	--
meta_15754	--	--	--
meta_15760	Cholesterol 3-sulfate	--	--
meta_15765	--	--	--
meta_15813	--	--	--
meta_15819	--	--	--
meta_15822	--	--	--
meta_15823	--	--	--
meta_15831	--	--	--
meta_15892	--	--	--
meta_15917	--	--	--
meta_15920	--	--	--
meta_15975	--	--	--
meta_15986	--	--	--
meta_15993	--	--	--
meta_15998	--	--	--
meta_16007	--	--	--
meta_16047	Folinic acid	C03479	Metabolic pathways(ko01100);;One carbon pool by folate(ko00670)
meta_16083	--	--	--
meta_16090	--	--	--
meta_16091	--	--	--
meta_16100	--	--	--
meta_16101	--	--	--
meta_16107	--	--	--
meta_16108	--	--	--
meta_16119	--	--	--
meta_16128	--	--	--
meta_16133	--	--	--
meta_16137	--	--	--
meta_16180	3-Hydroxyflavone	--	--
meta_16181	--	--	--
meta_16189	--	--	--
meta_16196	--	--	--
meta_16199	--	--	--
meta_16203	--	--	--
meta_16204	--	--	--
meta_16211	--	--	--
meta_16282	--	--	--
meta_16288	--	--	--
meta_16290	--	--	--
meta_16291	--	--	--
meta_16302	--	--	--
meta_16305	--	--	--
meta_16314	--	--	--
meta_16339	--	--	--
meta_16343	--	--	--
meta_16356	--	--	--
meta_16361	--	--	--
meta_16367	--	--	--
meta_16393	--	--	--
meta_16452	--	--	--
meta_16467	--	--	--
meta_16481	--	--	--
meta_16533	--	--	--
meta_16544	--	--	--
meta_16547	--	--	--
meta_16548	--	--	--
meta_16569	--	--	--
meta_16572	Pravastatin	--	--
meta_16630	--	--	--
meta_16646	--	--	--
meta_16659	--	--	--
meta_16664	--	--	--
meta_16692	--	--	--
meta_16716	--	--	--
meta_16722	--	--	--
meta_16727	--	--	--
meta_16728	--	--	--
meta_16733	--	--	--
meta_16803	--	--	--
meta_16804	--	--	--
meta_16805	--	--	--
meta_16809	--	--	--
meta_16827	--	--	--
meta_16828	--	--	--
meta_16829	--	--	--
meta_16845	--	--	--
meta_16896	.beta.-Estradiol 3,17-disulfate	--	--
meta_16897	--	--	--
meta_16905	--	--	--
meta_16906	--	--	--
meta_16922	--	--	--
meta_16923	--	--	--
meta_16945	--	--	--
meta_16983	--	--	--
meta_16985	--	--	--
meta_17010	--	--	--
meta_17034	--	--	--
meta_17080	--	--	--
meta_17096	--	--	--
meta_17104	--	--	--
meta_17110	Enterostatin human	--	--
meta_17139	--	--	--
meta_17176	--	--	--
meta_17245	--	--	--
meta_17248	--	--	--
meta_17249	--	--	--
meta_17259	--	--	--
meta_17260	--	--	--
meta_17269	--	--	--
meta_17281	--	--	--
meta_17305	--	--	--
meta_17332	--	--	--
meta_17359	--	--	--
meta_17360	--	--	--
meta_17362	--	--	--
meta_17368	--	--	--
meta_17418	--	--	--
meta_17422	--	--	--
meta_17428	Raffinose	C00492	ABC transporters(ko02010);;Galactose metabolism(ko00052)
meta_17440	--	--	--
meta_17443	--	--	--
meta_17526	--	--	--
meta_17529	--	--	--
meta_17538	--	--	--
meta_17544	--	--	--
meta_17602	--	--	--
meta_17608	--	--	--
meta_17610	--	--	--
meta_17618	--	--	--
meta_17619	--	--	--
meta_17620	--	--	--
meta_17623	--	--	--
meta_17689	--	--	--
meta_17690	--	--	--
meta_17718	--	--	--
meta_17736	--	--	--
meta_17750	--	--	--
meta_17751	--	--	--
meta_17769	--	--	--
meta_17770	--	--	--
meta_17776	--	--	--
meta_17800	--	--	--
meta_17832	--	--	--
meta_17837	--	--	--
meta_17840	--	--	--
meta_17847	--	--	--
meta_17908	1,3-Dicaffeoylquinic acid	--	--
meta_17911	--	--	--
meta_17913	Acetomenaphthone	--	--
meta_17917	3'-O-methyluridine	--	--
meta_17928	Vindoline	C01626	Indole alkaloid biosynthesis(ko00901)
meta_17966	--	--	--
meta_17991	--	--	--
meta_17994	--	--	--
meta_17997	--	--	--
meta_17999	--	--	--
meta_18004	--	--	--
meta_18010	--	--	--
meta_18054	--	--	--
meta_18086	--	--	--
meta_18101	--	--	--
meta_18111	--	--	--
meta_18112	--	--	--
meta_18118	--	--	--
meta_18119	--	--	--
meta_18133	--	--	--
meta_18136	--	--	--
meta_18141	Azlocillin	--	--
meta_18184	--	--	--
meta_18206	--	--	--
meta_18252	--	--	--
meta_18278	--	--	--
meta_18279	Hyperoside	--	--
meta_18295	Estriol 16.alpha.-(.beta.-D-glucuronide)	--	--
meta_18299	--	--	--
meta_18316	--	--	--
meta_18327	--	--	--
meta_18328	--	--	--
meta_18329	--	--	--
meta_18382	--	--	--
meta_18389	--	--	--
meta_18404	--	--	--
meta_18441	--	--	--
meta_18455	--	--	--
meta_18458	--	--	--
meta_18467	--	--	--
meta_18484	--	--	--
meta_18508	--	--	--
meta_18509	--	--	--
meta_18511	--	--	--
meta_18524	--	--	--
meta_18533	--	--	--
meta_18683	--	--	--
meta_18687	--	--	--
meta_18688	--	--	--
meta_18689	--	--	--
meta_18706	--	--	--
meta_18727	--	--	--
meta_18741	--	--	--
meta_18765	--	--	--
meta_18770	--	--	--
meta_18792	--	--	--
meta_18795	--	--	--
meta_18805	--	--	--
meta_18806	--	--	--
meta_18809	Hyperforin	--	--
meta_18812	--	--	--
meta_18866	--	--	--
meta_18868	--	--	--
meta_18873	--	--	--
meta_18877	--	--	--
meta_18931	--	--	--
meta_18957	Cyclic adenosine diphosphate ribose	--	--
meta_19000	--	--	--
meta_19009	--	--	--
meta_19022	--	--	--
meta_19043	--	--	--
meta_19057	--	--	--
meta_19106	--	--	--
meta_19134	--	--	--
meta_19136	--	--	--
meta_19193	--	--	--
meta_19195	--	--	--
meta_19205	--	--	--
meta_19208	--	--	--
meta_19209	--	--	--
meta_19210	--	--	--
meta_19230	--	--	--
meta_19250	--	--	--
meta_19255	--	--	--
meta_19302	--	--	--
meta_19314	--	--	--
meta_19336	3-Acetyl-11-keto-.beta.-boswellic acid	--	--
meta_19339	--	--	--
meta_19343	--	--	--
meta_19358	--	--	--
meta_19384	--	--	--
meta_19387	--	--	--
meta_19396	--	--	--
meta_19399	--	--	--
meta_19404	--	--	--
meta_19405	--	--	--
meta_19406	--	--	--
meta_19407	--	--	--
meta_19408	Nomilin	--	--
meta_19419	--	--	--
meta_19455	--	--	--
meta_19522	--	--	--
meta_19541	--	--	--
meta_19559	--	--	--
meta_19561	--	--	--
meta_19565	--	--	--
meta_19573	--	--	--
meta_19576	--	--	--
meta_19640	--	--	--
meta_19644	--	--	--
meta_19648	--	--	--
meta_19651	--	--	--
meta_19653	--	--	--
meta_19661	--	--	--
meta_19699	--	--	--
meta_19741	--	--	--
meta_19749	--	--	--
meta_19784	--	--	--
meta_19827	--	--	--
meta_19832	--	--	--
meta_19836	--	--	--
meta_19837	--	--	--
meta_19861	--	--	--
meta_19889	--	--	--
meta_19891	APIIN	C04858	Flavone and flavonol biosynthesis(ko00944)
meta_19895	--	--	--
meta_19899	--	--	--
meta_19920	--	--	--
meta_19968	--	--	--
meta_19970	Uridine diphosphate glucose(UDP-D-Glucose)	--	--
meta_19976	--	--	--
meta_19986	--	--	--
meta_20001	--	--	--
meta_20003	--	--	--
meta_20019	--	--	--
meta_20020	--	--	--
meta_20052	--	--	--
meta_20062	--	--	--
meta_20137	--	--	--
meta_20147	--	--	--
meta_20164	--	--	--
meta_20191	--	--	--
meta_20192	--	--	--
meta_20195	--	--	--
meta_20197	--	--	--
meta_20201	--	--	--
meta_20206	--	--	--
meta_20219	--	--	--
meta_20239	--	--	--
meta_20278	--	--	--
meta_20294	--	--	--
meta_20298	--	--	--
meta_20321	--	--	--
meta_20331	--	--	--
meta_20368	--	--	--
meta_20376	--	--	--
meta_20388	--	--	--
meta_20390	--	--	--
meta_20396	Adynerin	--	--
meta_20444	--	--	--
meta_20462	--	--	--
meta_20464	--	--	--
meta_20479	--	--	--
meta_20480	--	--	--
meta_20505	Protoporphyrin IX	C02191	Metabolic pathways(ko01100);;Porphyrin and chlorophyll metabolism(ko00860);;Biosynthesis of secondary metabolites(ko01110)
meta_20530	Uridine 5'-diphosphoglucuronic acid (UDP-D-glucuronate)	--	--
meta_20544	--	--	--
meta_20549	--	--	--
meta_20555	--	--	--
meta_20557	--	--	--
meta_20576	--	--	--
meta_20592	--	--	--
meta_20615	--	--	--
meta_20616	--	--	--
meta_20627	--	--	--
meta_20660	Ginkgetin	--	--
meta_20676	1-Stearoyl-sn-glycerol 3-phosphocholine	--	--
meta_20687	--	--	--
meta_20698	--	--	--
meta_20724	--	--	--
meta_20755	--	--	--
meta_20763	--	--	--
meta_20771	--	--	--
meta_20773	--	--	--
meta_20802	--	--	--
meta_20822	--	--	--
meta_20842	--	--	--
meta_20846	--	--	--
meta_20849	--	--	--
meta_20855	--	--	--
meta_20932	--	--	--
meta_20943	--	--	--
meta_20964	--	--	--
meta_20993	--	--	--
meta_20995	--	--	--
meta_21015	--	--	--
meta_21016	--	--	--
meta_21075	--	--	--
meta_21086	--	--	--
meta_21087	--	--	--
meta_21091	--	--	--
meta_21099	--	--	--
meta_21107	--	--	--
meta_21171	--	--	--
meta_21179	--	--	--
meta_21180	--	--	--
meta_21185	--	--	--
meta_21201	--	--	--
meta_21212	--	--	--
meta_21239	--	--	--
meta_21241	--	--	--
meta_21254	--	--	--
meta_21326	--	--	--
meta_21376	--	--	--
meta_21385	--	--	--
meta_21458	--	--	--
meta_21460	--	--	--
meta_21463	--	--	--
meta_21498	--	--	--
meta_21521	--	--	--
meta_21527	--	--	--
meta_21554	UDP-N-acetylglucosamine	C00043	Metabolic pathways(ko01100);;Vancomycin resistance(ko01502);;Amino sugar and nucleotide sugar metabolism(ko00520)
meta_21601	--	--	--
meta_21606	--	--	--
meta_21610	--	--	--
meta_21622	--	--	--
meta_21637	--	--	--
meta_21639	Diosmin	--	--
meta_21676	Rutin	C05625	Flavone and flavonol biosynthesis(ko00944);;Biosynthesis of secondary metabolites(ko01110);;Metabolic pathways(ko01100)
meta_21690	--	--	--
meta_21696	--	--	--
meta_21701	Manumycin A	--	--
meta_21708	--	--	--
meta_21710	--	--	--
meta_21712	--	--	--
meta_21789	--	--	--
meta_21800	--	--	--
meta_21805	--	--	--
meta_21825	--	--	--
meta_21856	--	--	--
meta_21913	--	--	--
meta_21932	--	--	--
meta_21948	--	--	--
meta_21954	--	--	--
meta_22017	--	--	--
meta_22024	--	--	--
meta_22034	--	--	--
meta_22048	--	--	--
meta_22096	--	--	--
meta_22102	--	--	--
meta_22106	--	--	--
meta_22116	--	--	--
meta_22169	--	--	--
meta_22170	--	--	--
meta_22179	--	--	--
meta_22188	--	--	--
meta_22196	--	--	--
meta_22197	--	--	--
meta_22227	--	--	--
meta_22235	--	--	--
meta_22255	--	--	--
meta_22262	--	--	--
meta_22273	--	--	--
meta_22293	--	--	--
meta_22298	--	--	--
meta_22299	--	--	--
meta_22306	--	--	--
meta_22314	--	--	--
meta_22354	--	--	--
meta_22381	--	--	--
meta_22392	--	--	--
meta_22423	--	--	--
meta_22430	--	--	--
meta_22432	--	--	--
meta_22498	--	--	--
meta_22509	--	--	--
meta_22542	--	--	--
meta_22568	--	--	--
meta_22582	--	--	--
meta_22587	--	--	--
meta_22591	--	--	--
meta_22597	--	--	--
meta_22602	--	--	--
meta_22617	--	--	--
meta_22664	--	--	--
meta_22672	--	--	--
meta_22678	--	--	--
meta_22679	--	--	--
meta_22683	--	--	--
meta_22695	--	--	--
meta_22754	--	--	--
meta_22760	--	--	--
meta_22761	--	--	--
meta_22768	--	--	--
meta_22773	--	--	--
meta_22831	--	--	--
meta_22844	--	--	--
meta_22896	--	--	--
meta_22903	--	--	--
meta_22910	--	--	--
meta_22932	--	--	--
meta_22951	--	--	--
meta_22966	--	--	--
meta_22967	--	--	--
meta_22977	--	--	--
meta_22982	--	--	--
meta_23045	--	--	--
meta_23058	--	--	--
meta_23072	--	--	--
meta_23099	Uridine 5'-monophosphate (UMP)	--	--
meta_23107	--	--	--
meta_23110	--	--	--
meta_23164	--	--	--
meta_23167	--	--	--
meta_23186	--	--	--
meta_23247	--	--	--
meta_23248	--	--	--
meta_23257	--	--	--
meta_23259	--	--	--
meta_23264	--	--	--
meta_23300	--	--	--
meta_23308	--	--	--
meta_23336	--	--	--
meta_23338	--	--	--
meta_23339	--	--	--
meta_23343	--	--	--
meta_23346	--	--	--
meta_23348	--	--	--
meta_23358	--	--	--
meta_23359	--	--	--
meta_23392	--	--	--
meta_23421	--	--	--
meta_23427	--	--	--
meta_23431	--	--	--
meta_23450	--	--	--
meta_23466	--	--	--
meta_23515	--	--	--
meta_23529	--	--	--
meta_23536	--	--	--
meta_23554	--	--	--
meta_23571	--	--	--
meta_23587	--	--	--
meta_23591	--	--	--
meta_23601	--	--	--
meta_23625	--	--	--
meta_23643	--	--	--
meta_23664	Nicotinamide adenine dinucleotide (NAD)	--	--
meta_23757	--	--	--
meta_23760	--	--	--
meta_23781	--	--	--
meta_23827	--	--	--
meta_23829	--	--	--
meta_23874	--	--	--
meta_23889	--	--	--
meta_23898	--	--	--
meta_23900	--	--	--
meta_23901	--	--	--
meta_23947	--	--	--
meta_23954	--	--	--
meta_23955	--	--	--
meta_23972	--	--	--
meta_23983	1-Palmitoyl-2-linoleoyl-sn-glycero-3-phosphate	C00416	Biosynthesis of secondary metabolites(ko01110);;Glycerophospholipid metabolism(ko00564);;Metabolic pathways(ko01100);;Phosphatidylinositol signaling system(ko04070);;Glycerolipid metabolism(ko00561)
meta_23984	--	--	--
meta_24039	--	--	--
meta_24043	--	--	--
meta_24071	--	--	--
meta_24073	--	--	--
meta_24074	1-Palmitoyl-2-oleoyl-sn-glycero-3-phosphate	C00416	Glycerophospholipid metabolism(ko00564);;Biosynthesis of secondary metabolites(ko01110);;Phosphatidylinositol signaling system(ko04070);;Metabolic pathways(ko01100);;Glycerolipid metabolism(ko00561)
meta_24127	--	--	--
meta_24128	--	--	--
meta_24130	--	--	--
meta_24134	--	--	--
meta_24231	--	--	--
meta_24236	--	--	--
meta_24291	--	--	--
meta_24292	--	--	--
meta_24294	--	--	--
meta_24312	--	--	--
meta_24320	--	--	--
meta_24340	--	--	--
meta_24380	--	--	--
meta_24381	--	--	--
meta_24401	--	--	--
meta_24406	--	--	--
meta_24414	--	--	--
meta_24427	--	--	--
meta_24448	--	--	--
meta_24461	--	--	--
meta_24478	--	--	--
meta_24480	--	--	--
meta_24483	--	--	--
meta_24486	--	--	--
meta_24518	--	--	--
meta_24532	--	--	--
meta_24557	--	--	--
meta_24578	--	--	--
meta_24595	--	--	--
meta_24608	--	--	--
meta_24627	--	--	--
meta_24639	--	--	--
meta_24645	--	--	--
meta_24668	--	--	--
meta_24689	--	--	--
meta_24707	--	--	--
meta_24714	--	--	--
meta_24726	--	--	--
meta_24764	--	--	--
meta_24795	--	--	--
meta_24806	--	--	--
meta_24812	--	--	--
meta_24817	--	--	--
meta_24825	--	--	--
meta_24880	--	--	--
meta_24886	--	--	--
meta_24917	--	--	--
meta_24942	--	--	--
meta_24951	--	--	--
meta_24956	--	--	--
meta_24958	--	--	--
meta_24960	--	--	--
meta_24966	--	--	--
meta_24973	--	--	--
meta_24990	--	--	--
meta_25035	--	--	--
meta_25036	--	--	--
meta_25059	--	--	--
meta_25100	--	--	--
meta_25124	--	--	--
meta_25182	--	--	--
meta_25199	--	--	--
meta_25213	--	--	--
meta_25278	--	--	--
meta_25311	--	--	--
meta_25337	--	--	--
meta_25344	--	--	--
meta_25345	--	--	--
meta_25371	--	--	--
meta_25406	--	--	--
meta_25422	--	--	--
meta_25424	--	--	--
meta_25428	--	--	--
meta_25431	--	--	--
meta_25435	--	--	--
meta_25437	--	--	--
meta_25440	--	--	--
meta_25507	--	--	--
meta_25509	--	--	--
meta_25559	--	--	--
meta_25563	--	--	--
meta_25571	--	--	--
meta_25579	--	--	--
meta_25627	--	--	--
meta_25638	--	--	--
meta_25650	--	--	--
meta_25656	--	--	--
meta_25659	--	--	--
meta_25660	--	--	--
meta_25669	--	--	--
meta_25688	--	--	--
meta_25753	--	--	--
meta_25792	--	--	--
meta_25793	--	--	--
meta_25796	--	--	--
meta_25797	--	--	--
meta_25802	--	--	--
meta_25805	--	--	--
meta_25810	--	--	--
meta_25854	--	--	--
meta_25897	--	--	--
meta_25941	--	--	--
meta_25990	--	--	--
meta_26003	--	--	--
meta_26085	--	--	--
meta_26089	--	--	--
meta_26112	--	--	--
meta_26116	--	--	--
meta_26119	--	--	--
meta_26120	--	--	--
meta_26123	--	--	--
meta_26174	--	--	--
meta_26181	--	--	--
meta_26196	--	--	--
meta_26210	--	--	--
meta_26266	--	--	--
meta_26343	--	--	--
meta_26367	--	--	--
meta_26368	--	--	--
meta_26374	--	--	--
meta_26379	--	--	--
meta_26432	--	--	--
meta_26452	--	--	--
meta_26463	--	--	--
meta_26485	--	--	--
meta_26519	--	--	--
meta_26530	--	--	--
meta_26553	--	--	--
meta_26593	--	--	--
meta_26600	--	--	--
meta_26604	--	--	--
meta_26605	--	--	--
meta_26637	--	--	--
meta_26663	--	--	--
meta_26664	--	--	--
meta_26698	--	--	--
meta_26748	--	--	--
meta_26783	--	--	--
meta_26784	--	--	--
meta_26819	--	--	--
meta_26876	--	--	--
meta_26899	--	--	--
meta_26906	--	--	--
meta_26908	--	--	--
meta_26985	--	--	--
meta_27005	--	--	--
meta_27055	--	--	--
meta_27067	--	--	--
meta_27115	--	--	--
meta_27127	--	--	--
meta_27133	--	--	--
meta_27188	--	--	--
meta_27203	--	--	--
meta_27207	--	--	--
meta_27238	--	--	--
meta_27272	--	--	--
meta_27339	--	--	--
meta_27400	--	--	--
meta_27406	--	--	--
meta_27439	--	--	--
meta_27440	--	--	--
meta_27478	--	--	--
meta_27505	--	--	--
meta_27600	--	--	--
meta_27601	--	--	--
meta_27614	--	--	--
meta_27664	--	--	--
meta_27668	--	--	--
meta_27680	--	--	--
meta_27704	--	--	--
meta_27766	--	--	--
meta_27793	--	--	--
meta_27855	--	--	--
meta_27879	--	--	--
meta_27896	--	--	--
meta_27908	--	--	--
meta_27929	--	--	--
meta_28003	--	--	--
meta_28012	--	--	--
meta_28022	--	--	--
meta_28076	--	--	--
meta_28116	--	--	--
meta_28133	--	--	--
meta_28136	--	--	--
meta_28142	--	--	--
meta_28205	--	--	--
meta_28219	--	--	--
meta_28291	--	--	--
meta_28360	--	--	--
meta_28369	--	--	--
meta_28416	--	--	--
meta_28434	--	--	--
meta_28477	--	--	--
meta_28489	--	--	--
meta_28499	--	--	--
meta_28553	--	--	--
meta_28554	--	--	--
meta_28573	--	--	--
meta_28577	--	--	--
meta_28581	--	--	--
meta_28623	--	--	--
meta_28670	--	--	--
meta_28677	--	--	--
meta_28685	--	--	--
meta_28691	--	--	--
meta_28692	--	--	--
meta_28704	--	--	--
meta_28719	Tacrolimus	--	--
meta_28746	--	--	--
meta_28801	--	--	--
meta_28804	--	--	--
meta_28822	--	--	--
meta_28920	--	--	--
meta_29008	--	--	--
meta_29012	--	--	--
meta_29130	--	--	--
meta_29146	--	--	--
meta_29174	--	--	--
meta_29188	--	--	--
meta_29242	--	--	--
meta_29246	--	--	--
meta_29279	--	--	--
meta_29307	--	--	--
meta_29366	--	--	--
meta_29437	--	--	--
meta_29532	--	--	--
meta_29546	--	--	--
meta_29569	--	--	--
meta_29579	--	--	--
meta_29582	--	--	--
meta_29590	--	--	--
meta_29599	--	--	--
meta_29602	--	--	--
meta_29610	--	--	--
meta_29643	--	--	--
meta_29644	--	--	--
meta_29664	--	--	--
meta_29708	--	--	--
meta_29709	--	--	--
meta_29774	--	--	--
meta_29786	--	--	--
meta_29789	--	--	--
meta_29893	--	--	--
meta_29902	--	--	--
meta_29958	--	--	--
meta_30004	--	--	--
meta_30005	--	--	--
meta_30010	--	--	--
meta_30012	--	--	--
meta_30053	--	--	--
meta_30059	--	--	--
meta_30069	--	--	--
meta_30072	--	--	--
meta_30118	--	--	--
meta_30121	--	--	--
meta_30195	--	--	--
meta_30221	--	--	--
meta_30240	--	--	--
meta_30271	--	--	--
meta_30283	--	--	--
meta_30331	--	--	--
meta_30409	--	--	--
meta_30456	--	--	--
meta_30473	--	--	--
meta_30495	--	--	--
meta_30500	--	--	--
meta_30506	--	--	--
meta_30536	--	--	--
meta_30537	--	--	--
meta_30549	Dioscin	--	--
meta_30559	--	--	--
meta_30648	--	--	--
meta_30654	--	--	--
meta_30706	--	--	--
meta_30708	--	--	--
meta_30747	--	--	--
meta_30748	--	--	--
meta_30771	--	--	--
meta_30839	--	--	--
meta_30981	--	--	--
meta_31016	--	--	--
meta_31019	--	--	--
meta_31025	--	--	--
meta_31058	--	--	--
meta_31074	--	--	--
meta_31075	--	--	--
meta_31098	--	--	--
meta_31115	--	--	--
meta_31119	--	--	--
meta_31165	--	--	--
meta_31275	--	--	--
meta_31288	--	--	--
meta_31289	--	--	--
meta_31358	--	--	--
meta_31359	--	--	--
meta_31421	--	--	--
meta_31443	--	--	--
meta_31447	--	--	--
meta_31484	--	--	--
meta_31514	--	--	--
meta_31524	--	--	--
meta_31539	--	--	--
meta_31576	--	--	--
meta_31579	--	--	--
meta_31618	--	--	--
meta_31621	--	--	--
meta_31677	--	--	--
meta_31682	--	--	--
meta_31768	--	--	--
meta_31885	--	--	--
meta_31925	--	--	--
meta_31938	--	--	--
meta_32022	--	--	--
meta_32087	--	--	--
meta_32129	--	--	--
meta_32148	--	--	--
meta_32242	--	--	--
meta_32286	--	--	--
meta_32329	--	--	--
meta_32338	--	--	--
meta_32406	--	--	--
meta_32449	Sildenafil	--	--
meta_32472	--	--	--
meta_32735	--	--	--
meta_32738	--	--	--
meta_32751	--	--	--
meta_32834	--	--	--
meta_32940	--	--	--
meta_33029	--	--	--
meta_33032	--	--	--
meta_33044	--	--	--
meta_33132	--	--	--
meta_33148	--	--	--
meta_33198	--	--	--
meta_33239	--	--	--
meta_33283	--	--	--
meta_33329	--	--	--
meta_33371	--	--	--
meta_33406	--	--	--
meta_33460	--	--	--
meta_33480	--	--	--
meta_33491	--	--	--
meta_33555	--	--	--
meta_33565	--	--	--
meta_33675	--	--	--
meta_33682	--	--	--
meta_33771	--	--	--
meta_33808	--	--	--
meta_33850	--	--	--
meta_33887	--	--	--
meta_33922	--	--	--
meta_33927	--	--	--
meta_33954	--	--	--
meta_33986	--	--	--
meta_34021	--	--	--
meta_34022	--	--	--
meta_34030	--	--	--
meta_34279	--	--	--
meta_34296	--	--	--
meta_34436	--	--	--
meta_34838	--	--	--
meta_34872	--	--	--
meta_34999	--	--	--
meta_35044	--	--	--
meta_35122	--	--	--
meta_35209	--	--	--
meta_35214	--	--	--
meta_35273	--	--	--
meta_35375	--	--	--
meta_35415	--	--	--
meta_35423	--	--	--
meta_35424	--	--	--
meta_35455	--	--	--
meta_35463	--	--	--
meta_35565	--	--	--
meta_35668	--	--	--
meta_35677	--	--	--
meta_35744	--	--	--
meta_35746	--	--	--
meta_35747	--	--	--
meta_35768	--	--	--
meta_35837	--	--	--
meta_36044	--	--	--
meta_36214	--	--	--
meta_36273	--	--	--
meta_36425	--	--	--
meta_36430	--	--	--
meta_36496	--	--	--
meta_36507	--	--	--
