# Supplementary material for: Integrative Analyses of Transcriptomes and Metabolomes Reveal Associated Genes and Metabolites with Flowering Regulation in Common Vetch (Vicia sativa L.)
Source: Int J Mol Sci. 2022 Jun 19;23(12):6818. doi: 10.3390/ijms23126818 (PMC9224626; doi:10.3390/ijms23126818)
Supplement: Supplementary file 1 [file ijms-23-06818-s001.zip › Table S5.xlsx]

## Sheet: Sheet1
Table S5. A total of 259 metabolites were identified and enriched to 73 KEGG pathways.
No.	Annotation	Number of differential metabolites	P-value	FDR correction
1	Metabolic pathways	80	1.06083e-06	7.74403e-05
2	Biosynthesis of phenylpropanoids	13	4.21583e-05	0.00102585
3	Biosynthesis of plant hormones	11	2.85928e-05	0.00102585
4	Phenylalanine metabolism	8	0.000220999	0.00403324
5	Pyrimidine metabolism	8	0.00125515	0.0159183
6	Biosynthesis of alkaloids derived from histidine and purine	6	0.00151183	0.0159183
7	Aminoacyl-tRNA biosynthesis	9	0.00152641	0.0159183
8	Phenylalanine, tyrosine and tryptophan biosynthesis	5	0.00265922	0.0232343
9	Arginine and proline metabolism	9	0.0028645	0.0232343
10	Phenylpropanoid biosynthesis	7	0.00366663	0.0267664
11	Pyruvate metabolism	5	0.00572317	0.0321378
12	Nicotinate and nicotinamide metabolism	6	0.00501191	0.0321378
13	Pentose phosphate pathway	5	0.00572317	0.0321378
14	Tyrosine metabolism	8	0.00631527	0.0329296
15	Ascorbate and aldarate metabolism	6	0.00696634	0.0339029
16	Starch and sucrose metabolism	6	0.00942228	0.0429892
17	Alanine, aspartate and glutamate metabolism	4	0.0106066	0.045546
18	Galactose metabolism	5	0.0163549	0.0596954
19	Pantothenate and CoA biosynthesis	4	0.0160885	0.0596954
20	Cysteine and methionine metabolism	6	0.0160889	0.0596954
21	Valine, leucine and isoleucine biosynthesis	4	0.018246	0.0634267
22	Glyoxylate and dicarboxylate metabolism	5	0.0217139	0.0720508
23	beta-Alanine metabolism	4	0.0257624	0.0817677
24	Flavone and flavonol biosynthesis	4	0.0316701	0.0889199
25	Terpenoid backbone biosynthesis	4	0.0316701	0.0889199
26	Biosynthesis of alkaloids derived from shikimate pathway	10	0.0296008	0.0889199
27	Glycine, serine and threonine metabolism	5	0.0329672	0.0891336
28	Citrate cycle (TCA cycle)	3	0.0354036	0.0897489
29	Biosynthesis of alkaloids derived from ornithine, lysine and nicotinic acid	6	0.0356537	0.0897489
30	Zeatin biosynthesis	4	0.0538156	0.130951
31	Nitrogen metabolism	3	0.0688847	0.162212
32	Lysine degradation	4	0.0934888	0.213271
33	Flavonoid biosynthesis	5	0.104408	0.217908
34	Biosynthesis of alkaloids derived from terpenoid and polyketide	4	0.0992174	0.217908
35	Glycolysis / Gluconeogenesis	3	0.104476	0.217908
36	Glycerolipid metabolism	3	0.112323	0.22161
37	Lysine biosynthesis	3	0.112323	0.22161
38	Sulfur metabolism	2	0.141042	0.270948
39	Taurine and hypotaurine metabolism	2	0.167176	0.305096
40	Glutathione metabolism	3	0.163616	0.305096
41	Tryptophan metabolism	5	0.177837	0.309078
42	Caffeine metabolism	2	0.18054	0.309078
43	Butanoate metabolism	3	0.18206	0.309078
44	Cyanoamino acid metabolism	3	0.191485	0.317691
45	Carbon fixation in photosynthetic organisms	2	0.207703	0.336941
46	Thiamine metabolism	2	0.249127	0.395354
47	Biosynthesis of terpenoids and steroids	5	0.294523	0.446329
48	Arachidonic acid metabolism	4	0.299591	0.446329
49	One carbon pool by folate	1	0.287549	0.446329
50	Pentose and glucuronate interconversions	3	0.311284	0.454475
51	C5-Branched dibasic acid metabolism	2	0.332201	0.466359
52	Vitamin B6 metabolism	2	0.332201	0.466359
53	Biotin metabolism	1	0.339338	0.46739
54	Propanoate metabolism	2	0.386275	0.522187
55	Amino sugar and nucleotide sugar metabolism	4	0.401679	0.533137
56	Valine, leucine and isoleucine degradation	2	0.451063	0.567717
57	alpha-Linolenic acid metabolism	2	0.4384	0.567717
58	Purine metabolism	4	0.443782	0.567717
59	Histidine metabolism	2	0.488064	0.603875
60	Glucosinolate biosynthesis	3	0.519592	0.626471
61	Indole alkaloid biosynthesis	2	0.52349	0.626471
62	Fructose and mannose metabolism	2	0.534932	0.62984
63	Stilbenoid, diarylheptanoid and gingerol biosynthesis	1	0.595937	0.683922
64	Biosynthesis of unsaturated fatty acids	2	0.599603	0.683922
65	Phosphatidylinositol signaling system	1	0.639378	0.718071
66	Selenoamino acid metabolism	1	0.678183	0.750111
67	Porphyrin and chlorophyll metabolism	4	0.692818	0.754861
68	Polyketide sugar unit biosynthesis	1	0.72355	0.754867
69	Methane metabolism	1	0.72355	0.754867
70	Tropane, piperidine and pyridine alkaloid biosynthesis	2	0.723845	0.754867
71	Ubiquinone and other terpenoid-quinone biosynthesis	2	0.779204	0.801154
72	Glycerophospholipid metabolism	1	0.824955	0.836413
73	Isoquinoline alkaloid biosynthesis	2	0.869687	0.869687
