# Supplementary material for: Integrative Analyses of Transcriptomes and Metabolomes Reveal Associated Genes and Metabolites with Flowering Regulation in Common Vetch (Vicia sativa L.)
Source: Int J Mol Sci. 2022 Jun 19;23(12):6818. doi: 10.3390/ijms23126818 (PMC9224626; doi:10.3390/ijms23126818)
Supplement: Supplementary file 1 [file ijms-23-06818-s001.zip › Table S6.xlsx]

## Sheet: Sheet1
Table S6. Details of 65 DEGs involved in the plant hormone signal transduction pathway.
No.	Gene ID	COG_annotation	GO_annotation	KEGG_annotation	KOG_annotation	NR_annotation
1	c53911.graph_c0	Cell wall/membrane/envelope biogenesis	Molecular Function: protein serine/threonine kinase activity (GO:0004674);; Molecular Function: ATP binding (GO:0005524);; Cellular Component: nucleus (GO:0005634);; Cellular Component: cytoplasm (GO:0005737);; Biological Process: protein phosphorylation (GO:0006468);; Biological Process: intracellular signal transduction (GO:0035556);;	K14498|4.20418e-177|mtr:MTR_4g099240|K14498 serine/threonine-protein kinase SRK2 [EC:2.7.11.1] | (RefSeq) sucrose nonfermenting 1(SNF1)-related kinase	Signal transduction mechanisms	sucrose nonfermenting 1(SNF1)-related kinase [Medicago truncatula]
2	c53377.graph_c0	General function prediction only	--	K14487|0|mtr:MTR_5g016320|K14487 auxin responsive GH3 gene family | (RefSeq) indole-3-acetic acid-amido synthetase	--	indole-3-acetyl-amido synthetase [Pisum sativum]
3	c52831.graph_c0	Coenzyme transport and metabolism ;; Translation, ribosomal structure and biogenesis	Cellular Component: chloroplast envelope (GO:0009941);;	K14487|0|cam:101497513|K14487 auxin responsive GH3 gene family | (RefSeq) putative indole-3-acetic acid-amido synthetase GH3.9	--	indole-3-acetic acid-amido synthetase [Medicago truncatula]
4	c45703.graph_c0	--	Biological Process: phosphorelay signal transduction system (GO:0000160);; Cellular Component: nucleus (GO:0005634);; Cellular Component: cytoplasm (GO:0005737);; Biological Process: cytokinin-activated signaling pathway (GO:0009736);; Molecular Function: histidine phosphotransfer kinase activity (GO:0009927);; Cellular Component: integral component of membrane (GO:0016021);; Biological Process: …	K14490|3.31512e-98|mtr:MTR_2g100880|K14490 histidine-containing phosphotransfer peotein | (RefSeq) histidine phosphotransfer protein	Signal transduction mechanisms	hypothetical protein TSUD_112160 [Trifolium subterraneum]
5	c57453.graph_c0	--	Biological Process: transcription, DNA-templated (GO:0006351);; Biological Process: regulation of cellular process (GO:0050794);;	K14484|3.40181e-113|mtr:MTR_8g014520|K14484 auxin-responsive protein IAA | (RefSeq) auxin response factor	--	auxin response factor [Medicago truncatula]
6	c44429.graph_c0	--	Biological Process: response to auxin (GO:0009733);;	K14488|4.50324e-90|mtr:MTR_1g024085|K14488 SAUR family protein | (RefSeq) SAUR-like auxin-responsive family protein	--	hypothetical protein TSUD_02740 [Trifolium subterraneum]
7	c27790.graph_c0	Function unknown	Cellular Component: extracellular region (GO:0005576);;	K13449|1.0083e-87|mtr:MTR_2g010600|K13449 pathogenesis-related protein 1 | (RefSeq) CAP, cysteine-rich secretory protein, antigen 5	Function unknown	CAP, cysteine-rich secretory protein, antigen 5 [Medicago truncatula]
8	c47493.graph_c0	--	Biological Process: G1/S transition of mitotic cell cycle (GO:0000082);; Cellular Component: nucleus (GO:0005634);; Biological Process: response to cytokinin (GO:0009735);; Biological Process: seed development (GO:0048316);;	K14505|5.59694e-129|mtr:MTR_1g107535|K14505 cyclin D3, plant | (RefSeq) carboxy-terminal domain cyclin	Cell cycle control, cell division, chromosome partitioning	cyclin D [Pisum sativum]
9	c43459.graph_c0	Lipid transport and metabolism	Biological Process: metabolic process (GO:0008152);; Molecular Function: hydrolase activity (GO:0016787);;	K14493|0|mtr:MTR_1g089310|K14493 gibberellin receptor GID1 [EC:3.-.-.-] | (RefSeq) gibberellin receptor GID1c-like protein	Defense mechanisms	gibberellin receptor GID1c-like protein [Medicago truncatula]
10	c59042.graph_c0	--	Molecular Function: protein serine/threonine kinase activity (GO:0004674);; Molecular Function: ATP binding (GO:0005524);; Biological Process: protein phosphorylation (GO:0006468);; Biological Process: signal transduction (GO:0007165);; Cellular Component: integral component of membrane (GO:0016021);; Molecular Function: transmembrane receptor protein kinase activity (GO:0019199);;	K13416|6.28129e-14|mtr:MTR_2g008380|K13416 brassinosteroid insensitive 1-associated receptor kinase 1 [EC:2.7.10.1 2.7.11.1] | (RefSeq) somatic embryogenesis receptor-like kinase	Signal transduction mechanisms	brassinosteroid insensitive 1-associated receptor kinase 1-like protein, partial [Trifolium pratense]
11	c49591.graph_c0	Signal transduction mechanisms	Molecular Function: protein serine/threonine phosphatase activity (GO:0004722);; Biological Process: protein dephosphorylation (GO:0006470);; Molecular Function: metal ion binding (GO:0046872);;	K14497|0|mtr:MTR_4g125810|K14497 protein phosphatase 2C [EC:3.1.3.16] | (RefSeq) protein phosphatase 2C ABI2-like protein	Signal transduction mechanisms	protein phosphatase 2C 16-like [Trifolium pratense]
12	c38038.graph_c0	--	Molecular Function: DNA binding (GO:0003677);; Molecular Function: transcription factor activity, sequence-specific DNA binding (GO:0003700);; Cellular Component: nucleus (GO:0005634);; Biological Process: regulation of transcription, DNA-templated (GO:0006355);;	K14516|2.9598e-80|mtr:MTR_1g074370|K14516 ethylene-responsive transcription factor 1 | (RefSeq) ethylene-responsive transcription factor 1B	--	ethylene-responsive transcription factor 1B [Medicago truncatula]
13	c52432.graph_c0	--	--	K14484|4.14195e-09|mtr:MTR_1g093350|K14484 auxin-responsive protein IAA | (RefSeq) auxin response factor	--	auxin response factor [Medicago truncatula]
14	c44817.graph_c1	--	Molecular Function: protein serine/threonine phosphatase activity (GO:0004722);; Biological Process: protein dephosphorylation (GO:0006470);; Molecular Function: metal ion binding (GO:0046872);;	K14497|0|mtr:MTR_2g040500|K14497 protein phosphatase 2C [EC:3.1.3.16] | (RefSeq) protein phosphatase 2C ABI2-like protein	Signal transduction mechanisms	protein phosphatase 2C ABI2-like protein [Medicago truncatula]
15	c61986.graph_c0	--	Biological Process: response to auxin (GO:0009733);;	K14488|1.09458e-71|mtr:MTR_1g061570|K14488 SAUR family protein | (RefSeq) SAUR-like auxin-responsive family protein	--	hypothetical protein TSUD_22900 [Trifolium subterraneum]
16	c54717.graph_c0	--	Molecular Function: protein serine/threonine phosphatase activity (GO:0004722);; Biological Process: protein dephosphorylation (GO:0006470);; Molecular Function: metal ion binding (GO:0046872);;	K14497|1.56928e-69|cam:101510725|K14497 protein phosphatase 2C [EC:3.1.3.16] | (RefSeq) probable protein phosphatase 2C 6	Signal transduction mechanisms	hypothetical protein TSUD_74800 [Trifolium subterraneum]
17	c46077.graph_c0	--	Molecular Function: transcription corepressor activity (GO:0003714);; Cellular Component: nucleus (GO:0005634);; Biological Process: response to wounding (GO:0009611);; Biological Process: regulation of defense response (GO:0031347);; Biological Process: negative regulation of nucleic acid-templated transcription (GO:1903507);; Biological Process: regulation of jasmonic acid mediated signaling pa…	K13464|2.463e-44|mtr:MTR_2g042900|K13464 jasmonate ZIM domain-containing protein | (RefSeq) jasmonate zim-domain protein	--	hypothetical protein TSUD_374120 [Trifolium subterraneum]
18	c23483.graph_c0	--	--	K14488|9.53614e-52|mtr:MTR_3g098970|K14488 SAUR family protein | (RefSeq) SAUR-like auxin-responsive family protein	--	SAUR-like auxin-responsive family protein [Medicago truncatula]
19	c27739.graph_c0	--	Molecular Function: protein phosphatase inhibitor activity (GO:0004864);; Molecular Function: receptor activity (GO:0004872);; Cellular Component: nucleus (GO:0005634);; Cellular Component: cytoplasm (GO:0005737);; Biological Process: abscisic acid-activated signaling pathway (GO:0009738);; Molecular Function: abscisic acid binding (GO:0010427);; Biological Process: negative regulation of catalyt…	K14496|2.02427e-107|cam:101508615|K14496 abscisic acid receptor PYR/PYL family | (RefSeq) abscisic acid receptor PYL4-like	--	putative abscisic acid receptor PYL4-like protein [Trifolium pratense]
20	c54236.graph_c0	--	Biological Process: response to auxin (GO:0009733);;	K14488|2.93354e-50|mtr:MTR_4g072560|K14488 SAUR family protein | (RefSeq) SAUR-like auxin-responsive family protein	--	SAUR-like auxin-responsive family protein [Medicago truncatula]
21	c26502.graph_c0	Energy production and conversion	Molecular Function: protein phosphatase inhibitor activity (GO:0004864);; Molecular Function: receptor activity (GO:0004872);; Cellular Component: nucleus (GO:0005634);; Cellular Component: cytoplasm (GO:0005737);; Biological Process: abscisic acid-activated signaling pathway (GO:0009738);; Molecular Function: abscisic acid binding (GO:0010427);; Biological Process: negative regulation of catalyt…	K14496|2.01251e-111|cam:101509736|K14496 abscisic acid receptor PYR/PYL family | (RefSeq) abscisic acid receptor PYL4-like	--	abscisic acid receptor PYL6 [Trifolium pratense]
22	c58212.graph_c0	--	Cellular Component: nucleus (GO:0005634);; Biological Process: regulation of transcription, DNA-templated (GO:0006355);; Biological Process: auxin-activated signaling pathway (GO:0009734);;	K14484|1.36804e-69|cam:101503044|K14484 auxin-responsive protein IAA | (RefSeq) auxin-induced protein 22E-like	--	auxin-induced protein 22e-like [Trifolium pratense]
23	c46017.graph_c0	--	Biological Process: response to auxin (GO:0009733);;	K14488|4.45186e-38|cam:101492295|K14488 SAUR family protein | (RefSeq) auxin-induced protein X15-like	--	hypothetical protein TSUD_347920 [Trifolium subterraneum]
24	c46829.graph_c0	Cell wall/membrane/envelope biogenesis	Molecular Function: protein serine/threonine kinase activity (GO:0004674);; Molecular Function: ATP binding (GO:0005524);; Cellular Component: nucleus (GO:0005634);; Cellular Component: cytoplasm (GO:0005737);; Biological Process: protein phosphorylation (GO:0006468);; Biological Process: response to osmotic stress (GO:0006970);; Biological Process: intracellular signal transduction (GO:0035556);;	K14498|7.06524e-165|mtr:MTR_5g064540|K14498 serine/threonine-protein kinase SRK2 [EC:2.7.11.1] | (RefSeq) Serine/Threonine-kinase SAPK1-like protein	Signal transduction mechanisms	Serine/Threonine-kinase SAPK1-like protein [Medicago truncatula]
25	c46145.graph_c0	General function prediction only	Cellular Component: chloroplast (GO:0009507);;	K14487|0|mtr:MTR_0102s0060|K14487 auxin responsive GH3 gene family | (RefSeq) indole-3-acetic acid-amido synthetase	--	indole-3-acetic acid-amido synthetase [Medicago truncatula]
26	c53497.graph_c0	--	Molecular Function: phosphoprotein phosphatase activity (GO:0004721);; Molecular Function: cation binding (GO:0043169);;	K14497|1.28073e-124|cam:101502712|K14497 protein phosphatase 2C [EC:3.1.3.16] | (RefSeq) protein phosphatase 2C 37-like	Signal transduction mechanisms	hypothetical protein TSUD_416530 [Trifolium subterraneum]
27	c55773.graph_c0	--	Molecular Function: transcription factor activity, sequence-specific DNA binding (GO:0003700);; Biological Process: regulation of transcription, DNA-templated (GO:0006355);; Molecular Function: sequence-specific DNA binding (GO:0043565);;	K14431|0|mtr:MTR_5g060950|K14431 transcription factor TGA | (RefSeq) BZIP family transcription factor	--	BZIP family transcription factor [Medicago truncatula]
28	c24015.graph_c0	--	Molecular Function: transcription corepressor activity (GO:0003714);; Cellular Component: nucleus (GO:0005634);; Biological Process: response to wounding (GO:0009611);; Cellular Component: integral component of membrane (GO:0016021);; Biological Process: regulation of defense response (GO:0031347);; Biological Process: negative regulation of nucleic acid-templated transcription (GO:1903507);; Bio…	K13464|1.10566e-62|mtr:MTR_8g021380|K13464 jasmonate ZIM domain-containing protein | (RefSeq) jasmonate zim-domain protein	--	protein TIFY 10A-like [Trifolium pratense]
29	c29185.graph_c1	--	Cellular Component: nucleus (GO:0005634);; Biological Process: regulation of transcription, DNA-templated (GO:0006355);; Biological Process: auxin-activated signaling pathway (GO:0009734);;	K14484|1.52263e-100|mtr:MTR_2g101500|K14484 auxin-responsive protein IAA | (RefSeq) auxin-responsive AUX/IAA family protein	--	auxin-responsive AUX/IAA family protein [Medicago truncatula]
30	c27375.graph_c0	--	Biological Process: response to auxin (GO:0009733);;	K14488|1.57653e-66|cam:101488799|K14488 SAUR family protein | (RefSeq) auxin-induced protein 6B	--	PREDICTED: auxin-induced protein 6B [Cicer arietinum]
31	c37548.graph_c0	--	Cellular Component: nucleus (GO:0005634);; Biological Process: regulation of transcription, DNA-templated (GO:0006355);; Biological Process: auxin-activated signaling pathway (GO:0009734);;	K14484|8.36733e-65|cam:101515097|K14484 auxin-responsive protein IAA | (RefSeq) auxin-responsive protein IAA30-like	--	auxin-responsive AUX/IAA family protein [Medicago truncatula]
32	c48410.graph_c0	--	Cellular Component: nucleus (GO:0005634);; Biological Process: regulation of transcription, DNA-templated (GO:0006355);; Biological Process: auxin-activated signaling pathway (GO:0009734);;	K14484|3.26577e-47|cam:101511640|K14484 auxin-responsive protein IAA | (RefSeq) auxin-responsive protein IAA14-like	--	PREDICTED: auxin-responsive protein IAA7-like [Juglans regia]
33	c41991.graph_c0	--	Cellular Component: nucleus (GO:0005634);; Biological Process: regulation of transcription, DNA-templated (GO:0006355);; Biological Process: auxin-activated signaling pathway (GO:0009734);; Cellular Component: membrane (GO:0016020);;	K14484|2.11691e-169|mtr:MTR_8g103030|K14484 auxin-responsive protein IAA | (RefSeq) auxin-responsive AUX/IAA family protein	--	auxin-responsive protein iaa27-like [Trifolium pratense]
34	c62771.graph_c0	--	Biological Process: response to auxin (GO:0009733);;	K14488|1.2957e-65|mtr:MTR_1g063260|K14488 SAUR family protein | (RefSeq) SAUR-like auxin-responsive family protein	--	hypothetical protein TSUD_400590 [Trifolium subterraneum]
35	c38381.graph_c0	--	Biological Process: response to auxin (GO:0009733);;	K14488|1.25103e-60|cam:101503322|K14488 SAUR family protein | (RefSeq) auxin-induced protein 15A	--	hypothetical protein TSUD_63050 [Trifolium subterraneum]
36	c47125.graph_c0	--	Molecular Function: transcription factor activity, sequence-specific DNA binding (GO:0003700);; Biological Process: regulation of transcription, DNA-templated (GO:0006355);; Biological Process: abscisic acid-activated signaling pathway (GO:0009738);; Molecular Function: sequence-specific DNA binding (GO:0043565);;	K14432|0|mtr:MTR_4g085910|K14432 ABA responsive element binding factor | (RefSeq) ABA response element-binding factor	--	ABA response element-binding factor [Medicago truncatula]
37	c51281.graph_c0	Energy production and conversion	Molecular Function: protein phosphatase inhibitor activity (GO:0004864);; Molecular Function: receptor activity (GO:0004872);; Cellular Component: nucleus (GO:0005634);; Cellular Component: cytoplasm (GO:0005737);; Biological Process: abscisic acid-activated signaling pathway (GO:0009738);; Molecular Function: abscisic acid binding (GO:0010427);; Biological Process: negative regulation of catalyt…	K14496|7.2614e-124|mtr:MTR_1g028380|K14496 abscisic acid receptor PYR/PYL family | (RefSeq) abscisic acid receptor PYL9-like protein	--	hypothetical protein TSUD_14780 [Trifolium subterraneum]
38	c47220.graph_c0	--	Biological Process: response to auxin (GO:0009733);;	K14488|4.21772e-73|cam:101494163|K14488 SAUR family protein | (RefSeq) indole-3-acetic acid-induced protein ARG7-like	--	auxin-induced protein 6B [Trifolium pratense]
39	c62005.graph_c0	--	Biological Process: response to auxin (GO:0009733);;	K14488|3.18329e-72|mtr:MTR_2g043960|K14488 SAUR family protein | (RefSeq) SAUR-like auxin-responsive family protein	--	SAUR-like auxin-responsive family protein [Medicago truncatula]
40	c30774.graph_c1	--	Biological Process: transcription, DNA-templated (GO:0006351);; Biological Process: regulation of cellular process (GO:0050794);;	K14484|1.66518e-40|mtr:MTR_7g096090|K14484 auxin-responsive protein IAA | (RefSeq) auxin-responsive AUX/IAA family protein	--	unknown [Medicago truncatula]
41	c22823.graph_c0	--	Biological Process: phosphorelay signal transduction system (GO:0000160);; Cellular Component: nucleus (GO:0005634);; Cellular Component: cytoplasm (GO:0005737);; Biological Process: cytokinin-activated signaling pathway (GO:0009736);; Molecular Function: histidine phosphotransfer kinase activity (GO:0009927);; Biological Process: phosphorylation (GO:0016310);; Molecular Function: protein histidi…	K14490|2.05983e-89|vra:106773913|K14490 histidine-containing phosphotransfer peotein | (RefSeq) histidine-containing phosphotransfer protein 4-like	Signal transduction mechanisms	PREDICTED: histidine-containing phosphotransfer protein 4-like [Vigna angularis]
42	c42102.graph_c0	Lipid transport and metabolism	Biological Process: metabolic process (GO:0008152);; Molecular Function: hydrolase activity (GO:0016787);;	K14493|0|mtr:MTR_7g093950|K14493 gibberellin receptor GID1 [EC:3.-.-.-] | (RefSeq) gibberellin receptor GID1c-like protein	Defense mechanisms	hypothetical protein TSUD_333410 [Trifolium subterraneum]
43	c53296.graph_c0	--	Molecular Function: protein serine/threonine phosphatase activity (GO:0004722);; Biological Process: protein dephosphorylation (GO:0006470);; Molecular Function: metal ion binding (GO:0046872);;	K14497|1.8783e-163|cam:101507599|K14497 protein phosphatase 2C [EC:3.1.3.16] | (RefSeq) probable protein phosphatase 2C 51	Signal transduction mechanisms	PREDICTED: probable protein phosphatase 2C 51 [Cicer arietinum]
44	c44930.graph_c0	Signal transduction mechanisms	Molecular Function: phosphorelay sensor kinase activity (GO:0000155);; Cellular Component: endoplasmic reticulum membrane (GO:0005789);; Biological Process: negative regulation of ethylene-activated signaling pathway (GO:0010105);; Cellular Component: integral component of membrane (GO:0016021);; Biological Process: peptidyl-histidine phosphorylation (GO:0018106);; Biological Process: signal tran…	K14509|0|cam:101512933|K14509 ethylene receptor [EC:2.7.13.-] | (RefSeq) ethylene receptor 2	Signal transduction mechanisms	ethylene response 2 [Pisum sativum]
45	c49752.graph_c0	Signal transduction mechanisms	Biological Process: transcription, DNA-templated (GO:0006351);; Biological Process: signal transduction (GO:0007165);;	K14491|0|mtr:MTR_2g034960|K14491 two-component response regulator ARR-B family | (RefSeq) B-type response regulator	Transcription	B-type response regulator [Medicago truncatula]
46	c27871.graph_c0	Coenzyme transport and metabolism ;; Translation, ribosomal structure and biogenesis	Biological Process: response to auxin (GO:0009733);;	K14487|0|mtr:MTR_0035s0150|K14487 auxin responsive GH3 gene family | (RefSeq) indole-3-acetic acid-amido synthetase	--	auxin-responsive GH3 family protein [Vicia faba]
47	c62763.graph_c0	--	Molecular Function: protein phosphatase inhibitor activity (GO:0004864);; Molecular Function: receptor activity (GO:0004872);; Cellular Component: nucleus (GO:0005634);; Cellular Component: cytoplasm (GO:0005737);; Biological Process: abscisic acid-activated signaling pathway (GO:0009738);; Molecular Function: abscisic acid binding (GO:0010427);; Biological Process: negative regulation of catalyt…	K14496|5.37773e-117|mtr:MTR_5g030500|K14496 abscisic acid receptor PYR/PYL family | (RefSeq) abscisic acid receptor PYR1-like protein	--	abscisic acid receptor PYR1-like protein [Medicago truncatula]
48	c61023.graph_c0	Carbohydrate transport and metabolism	Molecular Function: sugar:proton symporter activity (GO:0005351);; Molecular Function: glucose transmembrane transporter activity (GO:0005355);; Cellular Component: integral component of plasma membrane (GO:0005887);; Biological Process: proton transport (GO:0015992);; Molecular Function: 2-alkenal reductase [NAD(P)] activity (GO:0032440);; Biological Process: glucose import (GO:0046323);; Biolog…	K14487|0|mtr:MTR_7g094190|K14487 auxin responsive GH3 gene family | (RefSeq) indole-3-acetic acid-amido synthetase	General function prediction only	indole-3-acetic acid-amido synthetase [Medicago truncatula]
49	c45185.graph_c0	--	--	K13464|4.60237e-45|mtr:MTR_5g013530|K13464 jasmonate ZIM domain-containing protein | (RefSeq) jasmonate zim-domain protein	--	jasmonate zim-domain protein [Medicago truncatula]
50	c56543.graph_c0	Signal transduction mechanisms	Molecular Function: phosphorelay sensor kinase activity (GO:0000155);; Biological Process: phosphorelay signal transduction system (GO:0000160);; Cellular Component: intracellular (GO:0005622);; Cellular Component: integral component of membrane (GO:0016021);; Biological Process: peptidyl-histidine phosphorylation (GO:0018106);; Biological Process: signal transduction by protein phosphorylation (…	K14489|0|mtr:MTR_8g080770|K14489 arabidopsis histidine kinase 2/3/4 (cytokinin receptor) [EC:2.7.13.3] | (RefSeq) cytokinin receptor histidine kinase	Signal transduction mechanisms	cytokinin receptor histidine kinase [Medicago truncatula]
51	c51814.graph_c0	Cell wall/membrane/envelope biogenesis	Molecular Function: nucleotide binding (GO:0000166);; Molecular Function: protein kinase activity (GO:0004672);; Cellular Component: membrane (GO:0016020);; Biological Process: phosphorylation (GO:0016310);;	K13416|2.86314e-62|cam:101506449|K13416 brassinosteroid insensitive 1-associated receptor kinase 1 [EC:2.7.10.1 2.7.11.1] | (RefSeq) BRASSINOSTEROID INSENSITIVE 1-associated receptor kinase 1	--	PREDICTED: BRASSINOSTEROID INSENSITIVE 1-associated receptor kinase 1 [Cicer arietinum]
52	c22694.graph_c0	--	Biological Process: response to auxin (GO:0009733);;	K14488|5.05194e-63|gmx:100776099|K14488 SAUR family protein | (RefSeq) auxin-responsive protein SAUR24-like	--	PREDICTED: auxin-responsive protein SAUR24-like [Glycine max]
53	c22857.graph_c0	Transcription	--	K14515|0|cam:101507637|K14515 EIN3-binding F-box protein | (RefSeq) EIN3-binding F-box protein 2-like	General function prediction only	EIN3-binding F box protein 2 [Pisum sativum]
54	c62114.graph_c0	--	Molecular Function: DNA binding (GO:0003677);; Molecular Function: transcription factor activity, sequence-specific DNA binding (GO:0003700);; Cellular Component: nucleus (GO:0005634);; Biological Process: regulation of transcription, DNA-templated (GO:0006355);;	K14516|7.10911e-82|cam:101496212|K14516 ethylene-responsive transcription factor 1 | (RefSeq) ethylene-responsive transcription factor 1B-like	--	PREDICTED: ethylene-responsive transcription factor 1B-like [Cicer arietinum]
55	c53378.graph_c0	--	Biological Process: response to auxin (GO:0009733);;	K14488|2.91407e-63|mtr:MTR_8g096500|K14488 SAUR family protein | (RefSeq) SAUR-like auxin-responsive family protein	--	SAUR-like auxin-responsive family protein [Medicago truncatula]
56	c46877.graph_c1	--	Cellular Component: nucleus (GO:0005634);; Biological Process: regulation of transcription, DNA-templated (GO:0006355);; Biological Process: auxin-activated signaling pathway (GO:0009734);;	K14484|3.05438e-131|mtr:MTR_1g070520|K14484 auxin-responsive protein IAA | (RefSeq) auxin-responsive AUX/IAA family protein	--	auxin-responsive AUX/IAA family protein [Medicago truncatula]
57	c61786.graph_c0	Transcription ;; Signal transduction mechanisms	Molecular Function: phosphorelay sensor kinase activity (GO:0000155);; Cellular Component: endoplasmic reticulum (GO:0005783);; Biological Process: negative regulation of ethylene-activated signaling pathway (GO:0010105);; Cellular Component: integral component of membrane (GO:0016021);; Biological Process: signal transduction by protein phosphorylation (GO:0023014);; Molecular Function: ethylene…	K14509|0|cam:101492847|K14509 ethylene receptor [EC:2.7.13.-] | (RefSeq) ethylene response sensor 1	Signal transduction mechanisms	ERS-like ethylene receptor [Pisum sativum]
58	c54024.graph_c0	Coenzyme transport and metabolism ;; Translation, ribosomal structure and biogenesis	Biological Process: response to wounding (GO:0009611);; Biological Process: jasmonic acid metabolic process (GO:0009694);; Biological Process: induced systemic resistance, jasmonic acid mediated signaling pathway (GO:0009864);; Molecular Function: jasmonate-amino synthetase activity (GO:0080123);;	K14506|0|mtr:MTR_8g027920|K14506 jasmonic acid-amino synthetase | (RefSeq) indole-3-acetic acid-amido synthetase	--	indole-3-acetic acid-amido synthetase [Medicago truncatula]
59	c37949.graph_c0	--	Molecular Function: protein phosphatase inhibitor activity (GO:0004864);; Molecular Function: receptor activity (GO:0004872);; Cellular Component: nucleus (GO:0005634);; Cellular Component: cytoplasm (GO:0005737);; Biological Process: abscisic acid-activated signaling pathway (GO:0009738);; Molecular Function: abscisic acid binding (GO:0010427);; Biological Process: negative regulation of catalyt…	K14496|2.13053e-91|mtr:MTR_4g014460|K14496 abscisic acid receptor PYR/PYL family | (RefSeq) abscisic acid receptor	--	abscisic acid receptor PYL4 [Trifolium pratense]
60	c37637.graph_c0	--	Molecular Function: protein phosphatase inhibitor activity (GO:0004864);; Molecular Function: receptor activity (GO:0004872);; Cellular Component: nucleus (GO:0005634);; Cellular Component: cytoplasm (GO:0005737);; Biological Process: abscisic acid-activated signaling pathway (GO:0009738);; Molecular Function: abscisic acid binding (GO:0010427);; Biological Process: negative regulation of catalyt…	K14496|9.28945e-117|mtr:MTR_7g070050|K14496 abscisic acid receptor PYR/PYL family | (RefSeq) abscisic acid receptor	--	abscisic acid receptor [Medicago truncatula]
61	c38588.graph_c0	--	Biological Process: transcription, DNA-templated (GO:0006351);; Biological Process: regulation of cellular process (GO:0050794);;	K14484|8.0852e-100|mtr:MTR_2g100780|K14484 auxin-responsive protein IAA | (RefSeq) auxin-responsive AUX/IAA family protein	--	hypothetical protein TSUD_112110, partial [Trifolium subterraneum]
62	c43317.graph_c0	Coenzyme transport and metabolism ;; Translation, ribosomal structure and biogenesis	--	K14487|0|mtr:MTR_8g467000|K14487 auxin responsive GH3 gene family | (RefSeq) indole-3-acetic acid-amido synthetase	--	hypothetical protein TSUD_371120 [Trifolium subterraneum]
63	c53010.graph_c0	--	Molecular Function: protein serine/threonine kinase activity (GO:0004674);; Molecular Function: ATP binding (GO:0005524);; Cellular Component: nucleus (GO:0005634);; Cellular Component: cytoplasm (GO:0005737);; Biological Process: protein phosphorylation (GO:0006468);; Biological Process: intracellular signal transduction (GO:0035556);;	K14498|4.65176e-36|vvi:100240941|K14498 serine/threonine-protein kinase SRK2 [EC:2.7.11.1] | (RefSeq) serine/threonine-protein kinase SRK2I	Signal transduction mechanisms	abscisic acid-activated protein kinase [Vicia faba]
64	c61803.graph_c0	--	Biological Process: cellular process (GO:0009987);;	K14484|5.51936e-53|vra:106761359|K14484 auxin-responsive protein IAA | (RefSeq) auxin-responsive protein IAA17	--	auxin-responsive protein IAA17 [Vigna radiata var. radiata]
65	c43857.graph_c0	Signal transduction mechanisms	Molecular Function: protein serine/threonine phosphatase activity (GO:0004722);; Biological Process: protein dephosphorylation (GO:0006470);; Molecular Function: metal ion binding (GO:0046872);;	K14497|0|cam:101488329|K14497 protein phosphatase 2C [EC:3.1.3.16] | (RefSeq) protein phosphatase 2C 37	Signal transduction mechanisms	PREDICTED: protein phosphatase 2C 37 [Cicer arietinum]
